# Supplementary material for: Molecular heterogeneity and commonalities in pancreatic cancer precursors with gastric and intestinal phenotype
Source: HighWire-hosted journal article supplement (doi:10.1136/gutjnl-2021-326550), 2022-08-09
Supplement: gutjnl-2021-326550supp001_data_supplement.pdf [file gutjnl-2021-326550supp001_data_supplement.pdf]

## 1 Supplemental data

## 2 Methods

### 3 Immunohistochemistry

4 Staining was performed manually or using the Ventana BenchMark Ultra automated IHC/ISH  
5 slide staining system (Ventana Medical Systems Inc., Tucson, USA) (suppl. table 1a). The  
6 cytoplasmic expression of TFF3 and MUCL3 was evaluated using the immunoreactivity scoring  
7 system (IRS) based on staining intensity (0: negative, 1: mild, 2: moderate, 3: intense) and the  
8 percentage of stained cells (0: no positive cells, 1: <10% positive cells, 2: 10-50% positive cells,  
9 3: 51-80% positive cells, 4: >80% positive cells). The final score (0-12) was found by multiplying  
10 the positive cells proportion score (0-4) and the staining intensity score (0-3). The mean value  
11 of Ki67 proliferation rate of five randomly selected high power (40x) fields (HPFs) was  
12 calculated using the percentage of stained cells.

### 13 DNA/ RNA Isolation from FFPE samples

14 For genomic DNA or total RNA Isolation, 5-8 8- $\mu$ m-thick tissue sections were prepared, and  
15 lesions were dissected manually or by laser-capture microdissection (LMD), depending on  
16 their size to ensure adequate cellularity (>80%) for subsequent molecular analysis. For LMD,  
17 cresyl violet staining was done before using the Palm Microbeam System (Carl Zeiss,  
18 Oberkochen, Germany) according to the manufacturer's instructions. In some samples  
19 containing larger lesions, manual microdissection was used, as previously described.[1] The  
20 obtained cell clusters were isolated using the QIAamp DNA micro Kit or the GeneRead FFPE  
21 DNA Kit for DNA and the RNeasy FFPE Kit for RNA (all from Qiagen, Hilden, Germany) following  
22 the manufacturer's instructions. The genomic DNA quality control was performed by  
23 quantitative PCR using the Power SYBR™ Green PCR Master Mix on a StepOnePlus™ Real-Time  
24 PCR System. Quantification was performed with a self-designed primer assay (HML-2 for: 5'  
25 AAACGCCAATCCTGAGTGTC-3'; HML-2 rev: 5' CATAGCTCCTCCGATCCAT-3'). These primers  
26 are complementary to long terminal repeats (LTRs) of the HML 2 human endogenous  
27 retroviruses and have a length of about 115 bp.

## 1 Targeted NGS

2 A PDAC-Panel with two primer pools was created by the Ion AmpliSeq™ Designer (v5.6,  
3 ThermoFisher Scientific, Dreieich, Germany). The panel consists of 217 amplicons of 21 genes  
4 covering hot-spot mutational sites of 18 and the whole coding sequence of 3 (*ARID1A*, *TP53*  
5 and *RNF43*) additional genes relevant for PDAC (suppl. table 2). Barcoded libraries from gDNA  
6 (up to 10 ng per pool) were prepared using the Ion AmpliSeq Library kit 2.0 with Ion Xpress™  
7 Barcode adapters. The Ion library TaqMan™ Quantitation Kit was used for quantification of  
8 the libraries. The libraries were pooled and amplified in an emulsion PCR reaction using the  
9 Ion 520™ & Ion 530™ Kit-OT2. The resulting Ion Sphere particles (ISPs) were loaded on a 520™  
10 or 530™ Chip and sequenced on the Ion S5™ system (all reagents from ThermoFisher).

11 The results of the next generation sequencing from the Ion S5™ system were aligned to the  
12 human reference genome (GRCh37/hg19) using the S5 Ion Torrent Server VM (ThermoFisher).  
13 The Ion Reporter software (Version 5.12.0.0) was used for variant calling and annotations of  
14 the DNA panel sequencing. The parameters for variant calling were set equal for all samples.  
15 Following thresholds were defined: 3% allele frequency with a minimum coverage of 500 and  
16 a Phred Score of  $\geq 30$ . Detected variants were validated using the Integrative Genomics Viewer  
17 (IGV), ClinVar database from National Institutes of Health (NIH) and University of California  
18 Santa Cruz (UCSC) Genome Browser. Variants not present in the above mentioned databases  
19 were classified according to the American College of Medical Genetics and Genomics (ACMG)  
20 guidelines using the ACMG database (varsome.com; v7.3.7).[2]

## 21 Fusion transcript analysis

22 50 ng of isolated RNA were used for cDNA synthesis by QuantiTect Reverse Transcription Kit  
23 (Qiagen) and were subsequently subjected to library preparation using the Oncomine  
24 Comprehensive Assay Plus RNA (ThermoFisher) targeting over 1,300 isoforms of 49 tumor  
25 driver genes including approximately 200 known *BRAF* fusion transcripts. NGS was performed  
26 (as described above) and data analysis was done using the Oncomine Comprehensive Plus  
27 w2.1 - Fusion workflow implemented within the IonReporter Software package (V5.18;  
28 ThermoFisher).

## 29 Isolation of epithelial cells from the main pancreatic duct and from peripheral (branch) ducts

1 Specimens were obtained fresh from the operating theater and immediately subjected to  
2 gross examination. The main pancreatic duct was probed, and the specimen dissected by a  
3 pathologist along the probe. The main duct was then carefully dissected with a scissor and  
4 then fixed in 10% buffered formalin and embedded in paraffin. Peripheral tissue blocks were  
5 prepared, and branch-ducts were isolated by LMD, as described above. DNA extraction was  
6 performed as described above.

### 7 **Generation of $\beta$ -cells**

8  $\beta$ -cell populations from FFPE tissue were generated from 50- $\mu$ m-thick sections. Tissue sections  
9 were dewaxed with xylol and rehydrated in descending ethanol concentrations. Antigen  
10 retrieval was done at 80°C for one hour in a pressure cooker before tissue was digested with  
11 1% (w/v) collagenase Ia (Sigma, Steinheim, Germany) and 1%(w/v) dispase (Gibco, Grand  
12 Island, USA) for 45 min at 37°C to obtain single cells. The cell suspension was subsequently  
13 filtered (30  $\mu$ m mesh) and the cells were collected by centrifugation. Single cells were stained  
14 Insulin (Abcam, Cambridge, UK; 1:200). The stained cells were sorted with a BD FACS AriaTM  
15 III System. DNA was isolated from the sorted cells as described above.

### 16 **Transcriptome analysis**

17 After total RNA isolation, the samples were shipped to Macrogen (Seoul, Korea) for  
18 sequencing. Libraries from total RNA were prepared using the Illumina TruSeq™ Stranded  
19 mRNA Library Prep kit and sequenced with 2 x 100 bp on the Illumina NovaSeq 6000 (Illumina  
20 Inc, San Diego, USA). The raw data processing of the transcriptome data was performed by  
21 Macrogen. Briefly, adapter and low-quality base trimming was carried out with Trimmomatic  
22 (v0.38).[3] Trimmed reads were mapped against the GRCh38/hg38 human reference genome  
23 using the Bowtie2 (v2.3.4.1) aligner.[4] Afterwards, the aligned reads were assembled with  
24 Cufflinks (v2.2.1).[5] After assembly the abundance of gene was calculated in read counts per  
25 gene. Before differential gene expression analysis lowly expressed genes were filtered from  
26 the data set. Therefore, genes which showed a lower read count as 0.5 transcripts per million  
27 reads and were missing in more than one sample per group were excluded from further  
28 analysis. The filtered raw count matrix was normalized and batch-corrected using the DESeq2  
29 package (v3.14).[6] Finally, differentially expressed genes were calculated pairwise and  
30 defined as followed  $\log_2$  fold change of  $< -1$  and  $> 1$ , respectively, and the significance level of

1 the adjusted p-value was set to < 0.05. PCA, heatmap and expression plots were calculated  
2 based on the variance stabilizing transformation output of DESeq2

### 3 **Pathway analysis**

4 Gene set enrichment analysis

5 For methylation data, enrichment of KEGG terms was estimated for all differentially  
6 methylated probes (DMP) in a pair-wise manner. DMPs were defined as displaying a beta  
7 value change of 0.4 and an adjusted p-value < 0.05. Gene set enrichment was calculated with  
8 the gometh function of the missMethyl package (v.1.26.1).[7]

9 The single sample Gene Set Enrichment Analysis (ssGSEA) was performed only for RNA seq  
10 derived data. Briefly, the normalized enrichment scores (NES) were calculated on the variance  
11 stabilized transformation data with the GSEA package (v.1.40.1).[8] Differentially activated  
12 gene sets were calculated between the different precursor lesions as described by Larsen *et*  
13 *al.* with a p-value of < 0.05.[9]

14 VIPER analysis

15 The activation of transcription factors was calculated with the VIPER algorithm (v1.26.0).[9]  
16 For the analysis, the paad regulon was taken from the arcane.networks package (1.18.0).  
17 Activated transcription factors were defined as displaying a p-value < 0.005 and a NES score  
18 of >3 or >-3.

### 19 **Statistical analysis**

20 Statistical analysis was performed using the GraphPad Prism 8 software (GraphPad Software  
21 Inc., San Diego, USA) or R v. 3.6.0 (R Core Team 2018). Statistical significance in  
22 immunohistochemistry was determined by Kruskal-Wallis test with Dunn's multiple  
23 comparison test. Results are presented as means  $\pm$  standard error of the mean (SEM). P values  
24 less than 0.05 were considered statistically significant (\* p < 0.05; \*\* p < 0.01; \*\*\* p < 0.001).

## 1 References

- 2 1 Schlitter AM, Born D, Bettstetter M, *et al.* Intraductal papillary neoplasms of the bile  
3 duct: Stepwise progression to carcinoma involves common molecular pathways. *Mod*  
4 *Pathol* 2014;27:73–86.
- 5 2 Richards S, Aziz N, Bale S, *et al.* Standards and guidelines for the interpretation of  
6 sequence variants: a joint consensus recommendation of the American College of  
7 Medical Genetics and Genomics and the Association for Molecular Pathology. *Genet*  
8 *Med* 2015;17:405–24.
- 9 3 Bolger AM, Lohse M, Usadel B. Trimmomatic: a flexible trimmer for Illumina sequence  
10 data. *Bioinformatics*. 2014;30:2114-2120.
- 11 4 Langmead B, Salzberg SL. Fast gapped-read alignment with Bowtie 2. *Nat Methods*  
12 2012;9:357-9.
- 13 5 Li H, Handsaker B, Wysoker A, *et al.* The sequence alignment/map format and  
14 SAMtools. *Bioinformatics* 2009;25:2078-9.
- 15 6 Love MI, Huber W, Anders S. Moderated estimation of fold change and dispersion for  
16 RNA-seq data with DESeq2. *Genome Biol* 2014;15:550.
- 17 7 Phipson B, Maksimovic J, Oshlack A. missMethyl: an R package for analyzing data from  
18 Illumina's HumanMethylation450 platform. *Bioinformatics* 2016;32:286-8.
- 19 8 Hänzelmann S, Castelo R, Guinney J. GSEA: gene set variation analysis for microarray  
20 and RNA-seq data. *BMC Bioinformatics* 2013;14:7.
- 21 9 Larsen BM, Kannan M, Langer LF, *et al.* A pan-cancer organoid platform for precision  
22 medicine. *Cell Rep* 2021;36:109429.
- 23 10 Alvarez MJ, Shen Y, Giorgi FM, *et al.* Functional characterization of somatic mutations  
24 in cancer using network-based inference of protein activity. *Nat Genet* 2016;48:838-  
25 47.

26

1 **Supplementary tables**2 **Supplementary table 1a: Antibodies and protocols for immunohistochemistry.**

| Antibody    | Type    | Dilution | Antigen Demasking   | Source   |
|-------------|---------|----------|---------------------|----------|
| Anti-MUC1   | Mo Mono | 1:100    | CC1                 | Biocare  |
| Anti-MUC2   | Mo Mono | 1:100    | CC1                 | Dako     |
| Anti-MUC5AC | Mo Mono | 1:1000   | CC1                 | Chemicon |
| Anti-CDX2   | Mo Mono | 1:40     | CC1                 | BioGenex |
| Anti-MIB1   | Mo Mono | 1:100    | CC1                 | Dako     |
| Anti-TFF3   | Rb Mono | 1:2000   | EDTA buffer pH 9    | Abcam    |
| Anti-MUCL3  | Rb Poly | 1:500    | Citrate buffer pH 6 | LSBio    |

3 \*Rb: rabbit. Mo: mouse Mono: monoclonal. Poly: polyclonal. CC1: Cell Conditioning 1 (Ventana Medical System, Tucson, AZ,  
4 USA).

5 **Supplementary table 1b: Tissue collective used for Ki67, TFF3 and anti-MUC13 staining.**

| Type of lesion         | Number of lesions |
|------------------------|-------------------|
| <b>PanIN</b>           | <b>31</b>         |
| Low grade              | 26                |
| High grade             | 5                 |
| <b>Gastric IPMN</b>    | <b>28</b>         |
| Low grade              | 20                |
| High grade             | 8                 |
| <b>Intestinal IPMN</b> | <b>20</b>         |
| Low grade              | 9                 |
| High grade             | 11                |
| <b>PDAC</b>            | <b>24</b>         |

6

## 1 Supplementary table 2: Genes and amplicons in targeted NGS.

| Gene Symbol | Chr  | Ion AmpliSeq Fwd Primer (5'-3') | Ion AmpliSeq Rev Primer (5'-3') | Amplicon ID      |
|-------------|------|---------------------------------|---------------------------------|------------------|
| ALK         | chr2 | TCTCTCGGAGGAAGGACTTGAG          | GCCCAGACTCAGCTCAGTTAAT          | CHP2_ALK_1       |
| ALK         | chr2 | ACAGGGTACCAGGAGATGATGTAAG       | GGAAGAGTGGCCAAGATTGGA           | CHP2_ALK_2       |
| APC         | chr5 | GAGAGAACGCGGAATTGGTCTA          | GTATGAATGGCTGACACTTCTCCA        | CHP2_APC_1       |
| APC         | chr5 | AGCACTGATGATAAACACCTCAAGTT      | ATCTTCTTGACACAAAGACTGGCT        | CHP2_APC_2       |
| APC         | chr5 | TTCAATATCATCTTTGTCATCAGCTGAA    | TTTGGTTCTAGGGTGTGTGAC           | CHP2_APC_3       |
| APC         | chr5 | GCAGACTGCAGGGTTCTAGTT           | GTGAAGTACAGAAAGTACATCTGCT       | CHP2_APC_4       |
| APC         | chr5 | AGCCCCAGTGTCTCCAGATA            | CCCTCTGAAGTGCAGCATTACT          | CHP2_APC_5       |
| APC         | chr5 | AGAGGGTCCAGGTTCTCCA             | TCATTTCTGAACTGGAGGCATT          | CHP2_APC_6       |
| APC         | chr5 | ATGAAACAGAATCAGAGCAGCCTAAA      | CGTGATGACTTTGTTGGCATGG          | CHP2_APC_7       |
| ARID1A      | chr1 | CAAAATGAACAACAAGGCAGATGGG       | TCAGAGACTATCTAGTCCGGTGTCT       | ARID1A_10.112972 |
| ARID1A      | chr1 | CAGCTAACTTACTGGACTTGAGAATTTTT   | GAGTCAAGACAAAAATCACTACCTTGG     | ARID1A_10.135473 |
| ARID1A      | chr1 | CATGATGGGAACTGGACCTCCTTA        | TTAGCTGTGATGTGACTCTGAAGAAAT     | ARID1A_10.143283 |
| ARID1A      | chr1 | CCCCAGCCTACGGCTTC               | CCCCCGTAGGGCTCCA                | ARID1A_1.1.15178 |
| ARID1A      | chr1 | CCTAGGCCCGCCCTGA                | GGCTCCGGCCGTAGGGT               | ARID1A_1.1.16654 |
| ARID1A      | chr1 | CAGTCAAGAGACTTCTGAGACCCTTA      | CAGATAACGGTCCACCCACATC          | ARID1A_11.181180 |
| ARID1A      | chr1 | CCGCTGGGAAAGGAGCTG              | GCCTAGGGCCCGCTTC                | ARID1A_1.1.20289 |
| ARID1A      | chr1 | CTATCGCCTCTATGTGTCTGTGAAG       | GTACCACATGAAGCCAGTGAGTAC        | ARID1A_11.248116 |
| ARID1A      | chr1 | ACAACTCTACTACCCCAACC            | CTGCTGAGCGAAGGACGA              | ARID1A_1.1.2481  |
| ARID1A      | chr1 | CTCCAGAAATCCAGTTCTTCTACTACA     | ATAGAGGTCCAGAGGTTTCTACC         | ARID1A_11.279375 |
| ARID1A      | chr1 | CTCAGCAGCGCTTCGGG               | GGGCCCGCCACTGTAGT               | ARID1A_1.1.36612 |
| ARID1A      | chr1 | CTCGGAGCTGAAGAAAGCCG            | GCTCTCGGCCCGCTCT                | ARID1A_1.1.38056 |
| ARID1A      | chr1 | GAGCCGCTGTCCGCTCG               | GGAGTGTACTGGTGGTTGGG            | ARID1A_1.1.42139 |
| ARID1A      | chr1 | GGCCCCAGCAGAAGCTCTCAC           | AGCCCGGAGTGCCACCTC              | ARID1A_1.1.52554 |
| ARID1A      | chr1 | GGCTGCCGGCTCCAAGC               | GCTGGCGACGTGAGCA                | ARID1A_1.1.54514 |
| ARID1A      | chr1 | GGGATCATGGCCGCGCA               | CCGGCGGCTGCCTTCAT               | ARID1A_1.1.54590 |
| ARID1A      | chr1 | TTATCTGGCCTTCACTGAGGAGAA        | CTCACCTGAGTCAATCCACCAAT         | ARID1A_11.550938 |
| ARID1A      | chr1 | AGCCGGACTGAAGAAGCTCG            | GGCCCGGCTGAGTGAG                | ARID1A_1.1.6484  |
| ARID1A      | chr1 | CTCGCCCGGACCCCTCAG              | GCCAGACAATGGCAGCTCC             | ARID1A_1.2.19161 |
| ARID1A      | chr1 | GGGTACCAGGGCTACCC               | GGGCTCATGGGCGCTG                | ARID1A_1.2.26067 |
| ARID1A      | chr1 | GATATACCTCGACTCCTTTGGTTTGG      | AGGGTCTTCTCCCGTTCAAT            | ARID1A_12.293039 |
| ARID1A      | chr1 | GCCAGCTCCTTGAAAAGCAGTATATC      | GACCCATCCTTACCAGGAGAG           | ARID1A_12.311881 |
| ARID1A      | chr1 | AGACATCTTTCAGCTGTCTGATT         | CACAGATCCTTGGCATATCCTGTTG       | ARID1A_12.73402  |
| ARID1A      | chr1 | CCGGCGGACATGGCCTC               | CCTCCCACTCAGCTGTGTA             | ARID1A_1.2.9363  |
| ARID1A      | chr1 | CTCAACTTGTATCTCTGTCCACAGC       | CTGCTCTGGCCTTACCTCATG           | ARID1A_13.224100 |
| ARID1A      | chr1 | CTCCTGCGTGTCTTTGTTATATTGG       | TGGAGTCATGGAATCCGCTT            | ARID1A_13.228066 |
| ARID1A      | chr1 | GAGGAGACTTAAAGCCACCAACTC        | CAAGGAGTCCCATGCACTTATCT         | ARID1A_13.262576 |
| ARID1A      | chr1 | GCCTTGTAGATCCTCTGCTAAGAAG       | GCCCTGCATAGATCCTGATCC           | ARID1A_13.286741 |
| ARID1A      | chr1 | CTTAATGATGGAAGTACTCCACATTC      | CAAGTCAAATAGCAATCAGATCAGTCA     | ARID1A_14.234479 |
| ARID1A      | chr1 | TGACTCAAACCTGGGTATCA            | CATTTCACTGGCCCTGTCTTACG         | ARID1A_14.440936 |
| ARID1A      | chr1 | GACCACGACAGCACTATCCCTA          | TCATGTTCCCTCAGGCCCTATT          | ARID1A_15.209989 |
| ARID1A      | chr1 | TCACCCTTGCCTTTCTACG             | TCACTGTGCATAAGGACCTCCA          | ARID1A_15.321878 |
| ARID1A      | chr1 | CCAATTTTGTAGGACGGAGCCT          | CACCGAGACCAGGCTTACTC            | ARID1A_15.99688  |

|        |      |                               |                              |                    |
|--------|------|-------------------------------|------------------------------|--------------------|
| ARID1A | chr1 | CTAATCCTGTGTTCTTTGCCTCCT      | TTTTCAAGGCGAACCTGCATG        | ARID1A_16.147847   |
| ARID1A | chr1 | GGATGTATTCTCCTAGCCGCTAC       | TTGGGTGGAGAACTGATTGCCATA     | ARID1A_16.243588   |
| ARID1A | chr1 | AGCGTGCCATACAGCACT            | GGCAGTGGCAGGATAGGCA          | ARID1A_18.122838   |
| ARID1A | chr1 | AACCGCACCTCTCCTAGC            | TCCCGCGAATCATGGG             | ARID1A_18.17117    |
| ARID1A | chr1 | CAGATGAAATGCTGCACACAGATC      | GATACCTGAGGAATGTGATTCTGCAT   | ARID1A_18.249269   |
| ARID1A | chr1 | CAGGTATCCAGCCCTGCTC           | TGCTATGTGCGAGGCAGGT          | ARID1A_18.260793   |
| ARID1A | chr1 | CCACTGCCACAGCTGCTAC           | GCTGAGCAACCTCAGCTGAT         | ARID1A_18.303487   |
| ARID1A | chr1 | AAGGCTCGTGGCCTTCCC            | GTGCGTTCTCCATTGGC            | ARID1A_18.33212    |
| ARID1A | chr1 | CTGTGTCCACCAAGCATCTGG         | GGCACGCTGTACATCTCC           | ARID1A_18.457891   |
| ARID1A | chr1 | GCAAACATGCCACCACAAATGATG      | TGTTCCGGTTCACGCCATGATAG      | ARID1A_18.536845   |
| ARID1A | chr1 | GCCTTCCCCTCAGCAAGATGTATA      | GGTCTCGGCCAAACTGGAATG        | ARID1A_18.584475   |
| ARID1A | chr1 | ACATAGCACCTGCCCTGT            | GGGCAGATTAGGCAACCGAATG       | ARID1A_18.63843    |
| ARID1A | chr1 | TGCTCAGCAAGGCACCATG           | CGAGCCTTCGTGGTTGG            | ARID1A_18.820768   |
| ARID1A | chr1 | TTGTCTCTGCCTTAGAATTACAAGCG    | GCTGGGCAGCTTGTGCT            | ARID1A_18.880618   |
| ARID1A | chr1 | AGACGACATGGAGGTTTATTCAGG      | CCCAGGCACTGATACTCA           | ARID1A_19.54023    |
| ARID1A | chr1 | ATCTTCAGAGTAGCTTCACTGATGGG    | GTTGATGGTATCTAATGCCATGTG     | ARID1A_19.79292    |
| ARID1A | chr1 | CAACATCCTGCTGTATGATGACAAC     | GGCATGGAAGATATCTACAAGAGAGAAA | ARID1A_19.96133    |
| ARID1A | chr1 | ATCCTGGGAGGTTTCAGCAA          | GAAGCTGGCTTGCCTTGC           | ARID1A_20.1.247050 |
| ARID1A | chr1 | CCAGTTCAGAGAATAGTGAGGA        | GCAGCAGGCCACTGTCAAA          | ARID1A_20.1.351511 |
| ARID1A | chr1 | CCCTGGGAAGCATGTGACAAC         | CTTGATGGCCTCTGAACCTTAGC      | ARID1A_20.1.374770 |
| ARID1A | chr1 | CCTGTGCTACTGGCGGAT            | GGCCCTCCTGGTCTGTTG           | ARID1A_20.1.397870 |
| ARID1A | chr1 | CGAAGCCTGTCAATTTGTGCCA        | GTTAGTGGTGCCTGCTTCCG         | ARID1A_20.1.400147 |
| ARID1A | chr1 | CTGTTCTTAGGCCACTTTTCTCC       | CCCAGGATCCAGTAGCGTT          | ARID1A_20.1.464959 |
| ARID1A | chr1 | GAGGAAGTAGTTGAAAATGATGAGGAGA  | TCCACCACAAATGGATCATTCTTCTGTA | ARID1A_20.1.565326 |
| ARID1A | chr1 | GCAGCAAGTTTCCATTGGCATTAG      | AGGCTTCGAATGGTATTGGACAC      | ARID1A_20.1.612574 |
| ARID1A | chr1 | GCCTGATTGAGATCTTTGGCATTAAAA   | ACTTCTCTTCTTCTCTTCTTAGTTTA   | ARID1A_20.1.637352 |
| ARID1A | chr1 | GGGCCCCACCTGATGGA             | GTTCCGGTGGCTCTGTGC           | ARID1A_20.1.733579 |
| ARID1A | chr1 | GTGGTGGACTGCTCAGATAAGCT       | AGCTCTGTCTTGTCTCGAAGT        | ARID1A_20.1.787955 |
| ARID1A | chr1 | ACCGGAACATCAAGATCCTAGAG       | CCCTGGGTGTTGGACATC           | ARID1A_20.1.90003  |
| ARID1A | chr1 | ATGGTGCGCTTCTCAGT             | CGGCAAGGCTGCTCTAG            | ARID1A_20.2.152846 |
| ARID1A | chr1 | CAGTGCAAGAGGCGAGTATCG         | CCGCATCATGTCCACACTAGTTG      | ARID1A_20.2.222602 |
| ARID1A | chr1 | CCACTAATTATGAAAAGGAGGAGGAA    | CCCGAGATGTTGGCGAGTGTA        | ARID1A_20.2.247152 |
| ARID1A | chr1 | CCTTGCCGCCACACAGTT            | CAACAGCCGTGATTCTGACA         | ARID1A_20.2.313338 |
| ARID1A | chr1 | CTTGAGATGCTCCGGGAA            | AGGGCAAACTGCCAGTGTA          | ARID1A_20.2.409280 |
| ARID1A | chr1 | CTTCAGCTGAAGCCAGGAC           | CGACCATAGTGTATACAACCTTCT     | ARID1A_20.2.432258 |
| ARID1A | chr1 | AAACTCAGCATCCAGGACAACAAT      | GCCAGGTTGGCCAGCAGTA          | ARID1A_20.2.5295   |
| ARID1A | chr1 | ACCCAGGGCTGCTGCTCAT           | TCTCCAAGCAGTCCCACCA          | ARID1A_20.2.54967  |
| ARID1A | chr1 | GGCTGTTGGACATCTCGGT           | GTTTTGCATAAATAAGGGCAACAGTC   | ARID1A_20.2.603909 |
| ARID1A | chr1 | GGGCAGTTGGACCTATCTCCATAC      | CTGAGTTTGTGAGGGTTTCAA        | ARID1A_20.2.613243 |
| ARID1A | chr1 | TGGACGAGAACCCTCAGAGTTTAC      | GCTGTCTGACTGGCAATCAAAA       | ARID1A_20.2.760156 |
| ARID1A | chr1 | CATGGGCGGCTCTTATAC            | TAGTAGCACTGTAAATTAAGTGAAGCA  | ARID1A_2.198073    |
| ARID1A | chr1 | CTAACCCATACTCGCAGCAACA        | TCACAATCACCATCTACCTGCTG      | ARID1A_2.263887    |
| ARID1A | chr1 | GCCATCCAGTCCAATGGATCAG        | CCTGCATGGTCATCGGGTAC         | ARID1A_2.310812    |
| ARID1A | chr1 | AAACCTGTGTAAGTGGTTATATATTCAGT | CCATATGGCTGAGGTCATCTTGG      | ARID1A_2.6808      |
| ARID1A | chr1 | AGTCCAGCAAACTGCCTATTC         | ACCCAGAGTTAATTGGCTTTAAGTG    | ARID1A_3.115759    |



|        |       |                                 |                              |                 |
|--------|-------|---------------------------------|------------------------------|-----------------|
| ARID1A | chr1  | CAGCAAAGTCTCACCTCAG             | GGGATGGCTGCTGGGAGTAT         | ARID1A_3.189854 |
| ARID1A | chr1  | CAGCTCCACATCAGCAGTC             | AGCCTGCTGGGAGAGCGT           | ARID1A_3.203145 |
| ARID1A | chr1  | CAGGCTCAGTCTCCTTACCA            | GCAGGAGGCAGGGATATCTT         | ARID1A_3.210697 |
| ARID1A | chr1  | TGCTTCTATACTCATCATCAGTGCAT      | CTTTGCTGGTTGTAATATGGAGTCTG   | ARID1A_3.663071 |
| ARID1A | chr1  | TTTTCTTTCTACAGATTCCTCCTT        | CTGCTGCTGATACGAAGGTTG        | ARID1A_3.701387 |
| ARID1A | chr1  | AGCAGCAGCCACAGTCTCAA            | TGAGCCTGTGGCTGTGAGTA         | ARID1A_3.77267  |
| ARID1A | chr1  | CCATCACAGCTTTTGTCTTTCTGTGTAG    | ACCTTCAGAAGGTGCAGAAATACT     | ARID1A_4.173246 |
| ARID1A | chr1  | CTGGCCTTACATAATACTTTTCGC        | GATGCCTGAGACCCAAATGAATC      | ARID1A_4.215850 |
| ARID1A | chr1  | GAGGGCAAGAAGATATGAACCTGAG       | AGGTCAAATTAGCTAAACTTCCAACCA  | ARID1A_4.255932 |
| ARID1A | chr1  | GAGTCTGGAGTGAGCACATC            | CGAGAGTGGTCTGAGCGA           | ARID1A_5.220317 |
| ARID1A | chr1  | AGAATCTTTCTGCCTAATATACTAATCCATG | AGGAGACTGAGCTGGATTACTCT      | ARID1A_5.34011  |
| ARID1A | chr1  | AGTCTCTTTCTCTCCTACACT           | CAGTCACTTTCCCTCTCCCTAA       | ARID1A_5.70816  |
| ARID1A | chr1  | GATATGCTTATGTTGTTCTTTGTCTGGA    | CACTCAAATGTCTGCCCTAGCTC      | ARID1A_6.227771 |
| ARID1A | chr1  | AGCCATTTCTAGCTCTGAATTAACCTCC    | TCGATCTTGGGCAATGCTTGAT       | ARID1A_6.45476  |
| ARID1A | chr1  | CAGCCTTATCTCCGCGTCAG            | ACTGTTTTCTCTCACCCTGAT        | ARID1A_7.149596 |
| ARID1A | chr1  | CAGGATAAGGATGGAGAGCATTGTTC      | TGTGTATCTGTCTCCGGAA          | ARID1A_7.152412 |
| ARID1A | chr1  | CATGGCCAATATGCCACCTCA           | ATAATACATTTCTTGCACTGACACCCT  | ARID1A_8.210031 |
| ARID1A | chr1  | CCAATGCCAACTACCCAGTG            | GGCCATGTTAGGGCCATAAGG        | ARID1A_8.229785 |
| ARID1A | chr1  | GTTGCTAGTGAGTGACTAACCAAGTC      | GGCTGTCCATGCATTTGACCTC       | ARID1A_8.517555 |
| ARID1A | chr1  | AGGATGAGTCACGCCTCCATG           | GGCCTTACCTGTTTTGGATAGAGTTG   | ARID1A_8.91537  |
| ARID1A | chr1  | AGCACTATTTGGCTCCAGTTCAAATC      | GGTTGATCATGCCAGCCATACTATTAA  | ARID1A_9.65769  |
| BRAF   | chr7  | CATACTTACCATGCCACTTTCCCTT       | TTTCTTTTCTGTTGGCTTGACTTGA    | CHP2_BRAF_1     |
| BRAF   | chr7  | CCACAAAATGGATCCAGACAACCTGT      | GCTTGCTCTGATAGGAAAATGAGATCTA | CHP2_BRAF_2     |
| CDKN2A | chr9  | CACCAGCGTGTCCAGGAA              | CCCTGGCTCTGACCATTCTGT        | CHP2_CDKN2A_1   |
| CDKN2A | chr9  | CATCTATGCGGGCATGGTACT           | CGCTGGTGGTGTCTG              | CHP2_CDKN2A_2   |
| CTNNB1 | chr3  | ACTGTTTCGTATTTATAGCTGATTTGATGGA | CCTCTTCTCAGGATTGCCTTT        | CHP2_CTNNB1_1   |
| EGFR   | chr7  | CCTCATTGCCCTCAACACAGT           | TCAGTCCGGTTTTATTGTCATCATAGTT | CHP2_EGFR_1     |
| EGFR   | chr7  | CACCAGTACCAGATGGATGT            | CCCAAAGACTCTCCAAGATGGGATA    | CHP2_EGFR_2     |
| EGFR   | chr7  | AGACATGCATGAACATTTTTCTCCAC      | TCCAGACCAGGGTGTGTTTTTC       | CHP2_EGFR_3     |
| EGFR   | chr7  | TGTGGAGCTCTTACACCCA             | GTGCCAGGGACCTTACCTTATAC      | CHP2_EGFR_4     |
| EGFR   | chr7  | ACGTCTTCTCTCTCTGTCA             | CTGAGGTTCAGAGCCATGGA         | CHP2_EGFR_5     |
| EGFR   | chr7  | CATGCGAAGCCACACTGAC             | ACATAGTCCAGGAGGCA            | CHP2_EGFR_6     |
| EGFR   | chr7  | GACTATGTCCGGGAACACAAAGA         | CCCATGGCAAACCTTGCTA          | CHP2_EGFR_7     |
| EGFR   | chr7  | CGCAGCATGTCAAGATCACAGAT         | GCATGTGTTAAACAATACAGCTAGTG   | CHP2_EGFR_8     |
| FBXW7  | chr4  | TGACAATGTTTAAAGTGGTAGCTGTT      | ACTCATTGATAGTTGGAACCAACACA   | CHP2_FBXW7_1    |
| FBXW7  | chr4  | CCTGTGACTGCTGACCAAACCTTTTA      | CACATCTTCTTATAGGTGCTGAAAGG   | CHP2_FBXW7_2    |
| FBXW7  | chr4  | CCCAACCATGACAAGATTTTCCC         | GGTCATCACAATGAGAGACAACATCA   | CHP2_FBXW7_3    |
| FBXW7  | chr4  | ACTAACAAACCCTCTGCCATCATA        | TCTGCAGAGTTGTTAGCGGTT        | CHP2_FBXW7_4    |
| FBXW7  | chr4  | GTAGAATCTGCATTCCAGAGACAA        | TCTCTGATACATCAATCCGTGTTTGG   | CHP2_FBXW7_5    |
| FGFR2  | chr10 | CATCACTGTAAACCTTGACAGACAAAC     | TGGTCTCTCATTCTCCCATCCC       | CHP2_FGFR2_1    |
| FGFR2  | chr10 | CATCCTCTCTCAACTCCAACAGG         | AGTGGATCAAGCACGTGGAAAA       | CHP2_FGFR2_2    |
| FGFR2  | chr10 | GCTTCTTGGTCTGTCTTCTTCTT         | CTCCTCTGTGATCTGCAATCT        | CHP2_FGFR2_3    |
| FGFR2  | chr10 | TGGAAGCCAGCCATTTCTAAA           | GATGATGAAGATGATGGGAAACACAAG  | CHP2_FGFR2_4    |
| GNAS   | chr20 | TTGGTGAGATCCATTGACCTCAATTT      | TGAATGTCAAGAAACCATGATCTGT    | CHP2_GNAS_1     |
| GNAS   | chr20 | CCTCTGGAATAACAGCTGTCC           | TGATCCCTAACAAACACAGAAGCAA    | CHP2_GNAS_2     |

|        |       |                                    |                                 |                  |
|--------|-------|------------------------------------|---------------------------------|------------------|
| IDH1   | chr2  | CCAACATGACTTACTTGATCCCCAT          | ATCACCAAATGGCACCATACGA          | CHP2_IDH1_1      |
| IDH2   | chr15 | ACCCTGGCCTACCTGGTC                 | AGTTCAAGCTGAAGAAGATGTGGAA       | CHP2_IDH2_1      |
| KRAS   | chr12 | CAAAGAATGGCTGCACCAGTAATAT          | AGGCCTGCTGAAAATGACTGAATATAA     | CHP2_KRAS_1      |
| KRAS   | chr12 | TCCTCATGTACTGGTCCCTCATT            | GTAAAAGGTGCACTGTATAATCCAGACT    | CHP2_KRAS_2      |
| KRAS   | chr12 | CAGACTGTATTTATTTTCAGTGTACTTACCT    | GACTCTGAAGATGTACCTATGGTCTTA     | CHP2_KRAS_3      |
| NRAS   | chr1  | CCTCACCTCTATGGTGGGATCATAT          | GTTCTTGCTGGTGTGAAATGACTG        | CHP2_NRAS_1      |
| NRAS   | chr1  | TTGCCTGTCTCATGTATTGG               | CACCCCAGGATTCTTACAGAAAA         | CHP2_NRAS_2      |
| NRAS   | chr1  | GCACAAATGCTGAAAGCTGTACC            | CAAGTGTGATTTGCCAACAAAGGA        | CHP2_NRAS_3      |
| PIK3CA | chr3  | CCATAAAGCATGAACTATTTAAAGAAGCAAGA   | GGTTGAAAAAGCCGAAGGTCAC          | CHP2_PIK3CA_1    |
| PIK3CA | chr3  | TGGAATGCCAGAACTACAATCTTTTGAT       | AAGATCCAATCCATTTTGTGTGC         | CHP2_PIK3CA_10   |
| PIK3CA | chr3  | TGGATCTCCACACAATTAACAGCAT          | TGCTGTTCATGGATTGTCAATTC         | CHP2_PIK3CA_11   |
| PIK3CA | chr3  | CCCTTTTTAAAGTAATTGAACCAAGTAGGC     | TTTAAGATTACGAAGGATTGGTTAGACAGAA | CHP2_PIK3CA_2    |
| PIK3CA | chr3  | GACGCATTTCCACAGCTACAC              | AGCATCAGCATTTGACTTTACCTTATCA    | CHP2_PIK3CA_3    |
| PIK3CA | chr3  | CATAGGTGGAATGAATGGCTGAATTATG       | TCAATCAGCGGTATAATCAGGAGTTTTT    | CHP2_PIK3CA_4    |
| PIK3CA | chr3  | TCCCATTATTATAGAGATGATTGTTGAATTTTCT | CAAAACAAGTTTATATTTCCCATGCCA     | CHP2_PIK3CA_5    |
| PIK3CA | chr3  | GCTTTGAATCTTTGGCCAGTACCT           | CATAAGAGAGAAGGTTTGACTGCCATA     | CHP2_PIK3CA_6    |
| PIK3CA | chr3  | CAGAGTAACAGACTAGCTAGAGACAATGA      | GCACTTACCTGTGACTCCATAGAAA       | CHP2_PIK3CA_7    |
| PIK3CA | chr3  | CACGATTCTTTAGATCTGAGATGCACA        | CCTTTGTGTTTCATCCTTCTCTCTG       | CHP2_PIK3CA_8    |
| PIK3CA | chr3  | GATGCAGCCATTGACCTGTTTAC            | AGAAAACCATTACTTGTCCATCGTCT      | CHP2_PIK3CA_9    |
| PTEN   | chr10 | GCCATCTCTCTCCTCTTTTCTT             | GCCGCAGAAATGGATACAGGTC          | CHP2_PTEN_1      |
| PTEN   | chr10 | TGTTAATGGTGGCTTTTGTGTTGTTGT        | TCTACCTCACTCTAACCAAGCAGATAACT   | CHP2_PTEN_2      |
| PTEN   | chr10 | CCATAACCCACCACAGCTAGAA             | TGCCCGATGTAATAAATATGCACAT       | CHP2_PTEN_3      |
| PTEN   | chr10 | GGCTACGACCCAGTTACCATAG             | TGCCACTGGTCTATAATCCAGATGAT      | CHP2_PTEN_4      |
| PTEN   | chr10 | TGAGATCAAGATTGCAGATACAGAATCC       | ACCTTTAGCTGGCAGACCAC            | CHP2_PTEN_5      |
| PTEN   | chr10 | AGGTGAAGATATATTCTCCAATTCAGGAC      | TTGGATATTTCTCCAATGAAAGTAAAGTAC  | CHP2_PTEN_6      |
| PTEN   | chr10 | CACTTTTGGGTAATACATTCTCATACCAGGA    | TATACTGCAAATGCTATCGA            | CHP2_PTEN_7      |
| PTEN   | chr10 | GCAGTATAGAGCGTGCAGATAATGA          | CATCACATACACAAGTCAACAACCC       | CHP2_PTEN_8      |
| RNF43  | chr17 | CCAAACACATCTGGAGCACACT             | GCCTGACCCTCAATGACCTCTT          | RNF43_1.100174   |
| RNF43  | chr17 | CCGCTTTTGTAGTGGTGGT                | TGACTTTGACCCCTAGTGTACT          | RNF43_2.1.213215 |
| RNF43  | chr17 | ACAACCACACTGGCTGTGAA               | GCACCAGCTTGCCAGATT              | RNF43_2.1.22754  |
| RNF43  | chr17 | CGGTGTCAGAATCCATTAGAAAG            | GACAAGAGGCTGCTACCAGAAA          | RNF43_2.1.264668 |
| RNF43  | chr17 | CTCTCCCTACCACACCCACTT              | GTGGTTGTGCCTGACTCCTC            | RNF43_2.1.277654 |
| RNF43  | chr17 | CTGGGTGCACAGTTGCATC                | CCCTGGCCAGTTGACG                | RNF43_2.1.308947 |
| RNF43  | chr17 | GAAACCTGGGTTTCCCTGT                | GGGTCCATGGCAGCAGTTC             | RNF43_2.1.342797 |
| RNF43  | chr17 | AAAGTCACTGCTTAGGGAGCT              | AGAAAGCTATTGCACAGAACGC          | RNF43_2.1.4249   |
| RNF43  | chr17 | GGGACCAAGGATATGCCACACT             | TGCAAAAATCCAGCCTCTCTGC          | RNF43_2.1.479773 |
| RNF43  | chr17 | GGGCACTGTGGTTAGAGAG                | AAAAGCGGTTCCAGTGGCA             | RNF43_2.1.483268 |
| RNF43  | chr17 | GTGACTTGCTGATCAGGAGAAGGT           | GTTTCCAGCCATGTCCACTACC          | RNF43_2.1.554471 |
| RNF43  | chr17 | TTTTTGCAAGTTGAACAGACTGCT           | CAAGTACCAGATCCAATCAGC           | RNF43_2.1.716452 |
| RNF43  | chr17 | CTCCAGATCCACTGCTGTCA               | TTCCCCAGAGCTGCACATC             | RNF43_2.2.168519 |
| RNF43  | chr17 | GTAGGCTGATGTCCGTGCAG               | GCTTGCCAGTGCCCTTA               | RNF43_2.2.335644 |
| RNF43  | chr17 | GTGCTGTGAGGTGGATTGGAG              | CCCACGACCTGGTCCCTT              | RNF43_2.2.348341 |
| RNF43  | chr17 | GTGATGCCGAGGGCCCAT                 | CAGGTGCAAGACTCCACCTC            | RNF43_2.2.359855 |
| RNF43  | chr17 | AGGTGGTAGTGGGATGGC                 | TGTCTTCTGAATGCATTCTGTAGG        | RNF43_2.2.62203  |
| RNF43  | chr17 | CCTCTACTGTGATGTTGAACATG            | CCTGATTCTGGCAATCCTATGG          | RNF43_3.144168   |

|       |       |                                   |                             |                |
|-------|-------|-----------------------------------|-----------------------------|----------------|
| RNF43 | chr17 | AAGCCACATTCTAGACCTGTCTG           | CTCTTTTTCTCCAGGACTACGG      | RNF43_3.9926   |
| RNF43 | chr17 | TCCTCCAGACAGATGGCACA              | CCCAATCTGAGCCCCATTCT        | RNF43_4.332752 |
| RNF43 | chr17 | TTCAATCTCCCAGTCTGGTCAT            | AGCTGGCCACCAGGAGGTA         | RNF43_4.381754 |
| RNF43 | chr17 | TACTCCTTCTTCCCTAACCCAC            | ATGATGTGTGGATCCTAATGACAGT   | RNF43_5.252108 |
| RNF43 | chr17 | AAGCCAGGATGATCACAAGATGG           | CTCAAGGGAACCTCCAGTTAGCTAT   | RNF43_5.9080   |
| RNF43 | chr17 | CCCTGAGAGCTTTATCTTCTCCATC         | GACCTCAGCCCAACCTCTACT       | RNF43_6.126819 |
| RNF43 | chr17 | GTCTGGAGGTCTAGTGTGCT              | TGGGCACCTTCCCCCTGTA         | RNF43_6.251138 |
| RNF43 | chr17 | ATCAGCTTCTCAGCGTCATTACC           | CTGGATGGAGGAAGATAAAGCTCTCA  | RNF43_6.62210  |
| RNF43 | chr17 | CACAGGACAAAGTAGGGCTAAGTG          | AAGCTGATGGAGTTTGTGTACAAGAA  | RNF43_6.83735  |
| RNF43 | chr17 | CCAGCTTGACGATGCTGATGAAT           | TGGTACTCTCCCTAGAAAATGGAGAG  | RNF43_8.145848 |
| RNF43 | chr17 | GTGTAGGGCGAAGTGTGAGTC             | CCTAACCCAAGTCTGTCTCTCTG     | RNF43_8.334246 |
| RNF43 | chr17 | ATTTCCACTTCTCTCAGACCAAGTCAT       | CCTGTCACTGGCTAGCAAGGTA      | RNF43_8.99948  |
| RNF43 | chr17 | GCAAACACACCTTCCAAAGTGAGATT        | TGGACGCACAGGACTGGTAC        | RNF43_9.251835 |
| RNF43 | chr17 | ACAAAAGAAGAAAGACATATTTCAAACAGATG  | TTATCAGAGTGATCCCTTGAAAATGG  | RNF43_9.43347  |
| RNF43 | chr17 | AGCTTTCTGTCTGCTGATCTTCA           | GTATGTATGGTTGAAGTGCATTGCTG  | RNF43_9.83487  |
| SMAD4 | chr18 | CTCATGTGATCTATGCCGCTCT            | AGTCTACTTACCAATCCAGGTGATACA | CHP2_SMAD4_1   |
| SMAD4 | chr18 | TGCTACTTCTGAATTGAAATGGTTCA        | GATTACTACCATTACTCTGCAGTGTT  | CHP2_SMAD4_2   |
| SMAD4 | chr18 | ATGGTGAAGGATGAATATGTGCATGA        | GCTGGTAGCATTAGACTCAGATGG    | CHP2_SMAD4_3   |
| SMAD4 | chr18 | GTGAAGGACTGTTGCAGATAGCAT          | AAGGCCACATGGGTTAATTTG       | CHP2_SMAD4_4   |
| SMAD4 | chr18 | TTTCTTTAGGGCTTTCACAATGA           | CTGAGAAGTGACCCATAATCCATT    | CHP2_SMAD4_5   |
| SMAD4 | chr18 | GCTCCTGAGTATTGGTGTCCAT            | CCTGTGGACATTGGAGAGTTGA      | CHP2_SMAD4_6   |
| SMAD4 | chr18 | TGTAATTTCTTTTTCTTCTAAGGTTGCACATAG | ACTTGGGTAGATCTTATGAACAGCAT  | CHP2_SMAD4_7   |
| SMAD4 | chr18 | AGGCTTTGATTGCGTCAGTGT             | GCTGGAGCTATTCCACTACTG       | CHP2_SMAD4_8   |
| SMAD4 | chr18 | GCTGCTGGAATTGGTGTGATG             | AGTACTCGTCTAGGAGCTGGAG      | CHP2_SMAD4_9   |
| STK11 | chr19 | GAGCTGATGTCGGTGGGTAT              | CTCCGAGTCCAGCACCTC          | CHP2_STK11_1   |
| STK11 | chr19 | CTCCAGGCAGCTGCAA                  | CCGGTGGTGAGCAGCAG           | CHP2_STK11_2   |
| STK11 | chr19 | CCGGTGGCACCTCAA                   | CTGGTCCGGCAGGTGTC           | CHP2_STK11_3   |
| STK11 | chr19 | AACATCACACGGGTCTGTAC              | GATGAGGCTCCACCTTTCAG        | CHP2_STK11_4   |
| STK11 | chr19 | GAAGAAACATCCTCCGGCTGAA            | ACCGTGAAGTCTGAGTGTAGA       | CHP2_STK11_5   |
| TP53  | chr17 | TCCACTCACAGTTTCCATAGGTCT          | GTTGGAAGTGTCTCATGCTGGAT     | CHP2_TP53_1    |
| TP53  | chr17 | GGCTGTCCAGAATGCAAGAA              | GATGAAGCTCCAGAATGCCA        | CHP2_TP53_2    |
| TP53  | chr17 | TGCACAGGGCAGGTCTTG                | CCGTCTCCAGTTGCTTTATCTGT     | CHP2_TP53_3    |
| TP53  | chr17 | ACCAGCCTGTCTCTCT                  | GTGCAGCTGTGGTTGATTC         | CHP2_TP53_4    |
| TP53  | chr17 | CCAGTTGCAAACAGACCTCA              | AGGCCTCTGATTCCTCACTGAT      | CHP2_TP53_5    |
| TP53  | chr17 | GGCTCCTGACCTGGAGTCTT              | CTCATCTTGGGCTGTGTTATCTC     | CHP2_TP53_6    |
| TP53  | chr17 | CGCTTCTGTCTGCTTCT                 | TTCTTTTTCTATCTGAGTAGTGGT    | CHP2_TP53_7    |
| TP53  | chr17 | GGAAGGGGCTGAGGTCACT               | CCCCTCTCTGTTGCTGC           | CHP2_TP53_8    |
| VHL   | chr3  | CTCCAGGTCATCTTCTGCAAT             | GTACCTCGGTAGCTGTGGATG       | CHP2_VHL_1     |
| VHL   | chr3  | GTGGCTCTTAAACCTTTGCT              | GTCAGTACCTGGCAGTGTGATA      | CHP2_VHL_2     |
| VHL   | chr3  | GGCAAAGCCTCTTGTCTGTTTC            | TGACGATGTCCAGTCTCTGTAAT     | CHP2_VHL_3     |

1

1 **Supplementary table 3: Mutation profile of precursor lesions detected by targeted NGS.**

| Grade            | Gene          | Sample     | Variant    | VAF [%]             | Variant Effect       | Transcript     |
|------------------|---------------|------------|------------|---------------------|----------------------|----------------|
| low-grade PanIN  | <i>ARID1A</i> | <b>113</b> | Gln802fs   | 4.83                | frameshift/insertion | NM_006015.5    |
|                  | <i>CDKN2A</i> | 74         | Arg58Ter   | 3.48                | nonsense             | NM_001195132.1 |
|                  | <i>GNAS</i>   | 127        | Arg201His  | 20.17               | missense             | NM_000516.5    |
|                  | <i>KRAS</i>   | 52         | Gly12Val   | 15.38               | missense             | NM_033360.3    |
|                  |               | <b>55</b>  | Gly12Val   | 9.66                | missense             | NM_033360.3    |
|                  |               | <b>56</b>  | Gly12Asp   | 6.13                | missense             | NM_033360.3    |
|                  |               | 69         | Gln61His   | 4.08                | missense             | NM_033360.3    |
|                  |               | 74         | Gly12Asp   | 12.05               | missense             | NM_033360.3    |
|                  |               | <b>111</b> | Gly12Val   | 11.19               | missense             | NM_033360.3    |
|                  |               | 125        | Gly12Val   | 4.29                | missense             | NM_033360.3    |
|                  |               | 127        | Gly12Asp   | 18.24               | missense             | NM_033360.3    |
|                  |               | 128        | Gly12Asp   | 3.42                | missense             | NM_033360.3    |
|                  |               | 129        | Gly12Asp   | 3.7                 | missense             | NM_033360.3    |
|                  |               | <b>113</b> | Gly12Arg   | 4.18                | missense             | NM_033360.3    |
|                  |               | <b>113</b> | Gly12Val   | 8.75                | missense             | NM_033360.3    |
|                  |               | <b>43</b>  | Gly12Val   | 12.88               | missense             | NM_033360.3    |
|                  | <i>PIK3CA</i> | 68         | Arg349Ter  | 3.74                | nonsense             | NM_006218.3    |
| 127              |               | Phe83fs    | 4.52       | frameshift/deletion | NM_006218.3          |                |
| <i>PTEN</i>      |               | 128        | Asn323fs   | 22.37               | frameshift/deletion  | NM_000314.6    |
| high-grade PanIN | <i>ARID1A</i> | 73         | Trp2091Ter | 7.46                | nonsense             | NM_006015.4    |
|                  | <i>GNAS</i>   | 96         | Arg201His  | 3.42                | missense             | NM_000516.5    |
|                  | <i>KRAS</i>   | 73         | Gly12Asp   | 8.29                | missense             | NM_033360.3    |
|                  |               | <b>80</b>  | Gly12Val   | 16.59               | missense             | NM_033360.3    |
|                  |               | 101        | Gly12Asp   | 13.7                | missense             | NM_033360.3    |
|                  |               | <b>104</b> | Gly12Asp   | 5.15                | missense             | NM_033360.3    |
|                  |               | <b>114</b> | Gly12Val   | 18.3                | missense             | NM_033360.3    |

|                           |               |            |           |       |                      |             |
|---------------------------|---------------|------------|-----------|-------|----------------------|-------------|
|                           | <i>TP53</i>   | <b>80</b>  | Arg213Ter | 34.5  | nonsense             | NM_000546.5 |
|                           |               | <b>104</b> | Arg196Ter | 4.04  | nonsense             | NM_000546.5 |
| low-grade IPMN<br>gastric | <i>ARID1A</i> | 21         | Asp1850fs | 7.45  | frameshift/insertion | NM_006015.5 |
|                           | <i>GNAS</i>   | <b>2</b>   | Arg201His | 33.98 | missense             | NM_000516.5 |
|                           |               | <b>7</b>   | Arg201Cys | 11.34 | missense             | NM_000516.5 |
|                           |               | <b>35</b>  | Arg201His | 41.52 | missense             | NM_000516.5 |
|                           |               | <b>62</b>  | Arg201Cys | 15.56 | missense             | NM_000516.5 |
|                           |               | <b>86</b>  | Arg201His | 30.46 | missense             | NM_000516.5 |
|                           |               | 89         | Arg201His | 5.56  | missense             | NM_000516.5 |
|                           |               | <b>94</b>  | Arg201His | 21.97 | missense             | NM_000516.5 |
|                           |               | <b>97</b>  | Arg201Cys | 33.81 | missense             | NM_000516.5 |
|                           |               | <b>99</b>  | Arg201His | 25.08 | missense             | NM_000516.5 |
|                           |               | <b>110</b> | Arg201Cys | 22.37 | missense             | NM_000516.5 |
|                           |               | <b>112</b> | Arg201His | 24.32 | missense             | NM_000516.5 |
|                           |               | <b>54</b>  | Arg201Cys | 23.16 | missense             | NM_000516.5 |
|                           | <i>KRAS</i>   | 21         | Gly12Val  | 18.86 | missense             | NM_033360.3 |
|                           |               | <b>2</b>   | Gly12Val  | 35.1  | missense             | NM_033360.3 |
|                           |               | <b>7</b>   | Gly12Val  | 12.14 | missense             | NM_033360.3 |
|                           |               | <b>35</b>  | Gly12Asp  | 38.57 | missense             | NM_033360.3 |
|                           |               | <b>39</b>  | Gly12Val  | 35    | missense             | NM_033360.3 |
|                           |               | <b>61</b>  | Gly12Val  | 18.03 | missense             | NM_033360.3 |
|                           |               | <b>62</b>  | Gly12Val  | 18.5  | missense             | NM_033360.3 |
|                           |               | 64         | Gly12Val  | 9.01  | missense             | NM_033360.3 |
|                           |               | <b>86</b>  | Gly12Val  | 27.81 | missense             | NM_033360.3 |
|                           |               | 89         | Gln61His  | 36.49 | missense             | NM_033360.3 |
|                           |               | <b>94</b>  | Gly12Asp  | 21.16 | missense             | NM_033360.3 |
|                           |               | <b>97</b>  | Gly12Asp  | 33.68 | missense             | NM_033360.3 |

|                               |               |            |            |       |          |             |
|-------------------------------|---------------|------------|------------|-------|----------|-------------|
|                               |               | <b>99</b>  | Gly12Val   | 26.83 | missense | NM_033360.3 |
|                               |               | <b>110</b> | Gly12Val   | 24.76 | missense | NM_033360.3 |
|                               |               | <b>57</b>  | Gly12Arg   | 6.96  | missense | NM_033360.3 |
|                               | <i>STK11</i>  | <b>61</b>  | Tyr60Ter   | 61.89 | nonsense | NM_000455.4 |
| high-grade IPMN<br>gastric    | <i>ARID1A</i> | 130        | Gln2115Ter | 30.84 | nonsense | NM_006015.5 |
|                               | <i>GNAS</i>   | 51         | Arg201Cys  | 31.03 | missense | NM_000516.5 |
|                               | <i>KRAS</i>   | 51         | Gly12Val   | 33.12 | missense | NM_033360.3 |
|                               |               | 65         | Gly12Asp   | 16.51 | missense | NM_033360.3 |
|                               |               | 66         | Gly12Asp   | 33.64 | missense | NM_033360.3 |
|                               |               | 130        | Gly12Asp   | 22.65 | missense | NM_033360.3 |
|                               |               | 131        | Gly12Asp   | 23.98 | missense | NM_033360.3 |
|                               | <i>TP53</i>   | 65         | Arg248Trp  | 17.99 | missense | NM_000546.5 |
| low-grade IPMN<br>intestinal  | <i>GNAS</i>   | <b>92</b>  | Arg201Cys  | 80.59 | missense | NM_000516.5 |
|                               | <i>KRAS</i>   | <b>92</b>  | Gly12Arg   | 37.95 | missense | NM_033360.3 |
| high-grade IPMN<br>intestinal | <i>GNAS</i>   | <b>33</b>  | Arg201Cys  | 45.42 | missense | NM_000516.5 |
|                               |               | <b>88</b>  | Arg201Cys  | 36.81 | missense | NM_000516.5 |
|                               |               | <b>90</b>  | Arg201His  | 35.51 | missense | NM_000516.5 |
|                               |               | 17         | Gln227Lys  | 42.36 | missense | NM_000516.5 |
|                               | <i>KRAS</i>   | <b>88</b>  | Gly12Ser   | 33.81 | missense | NM_033360.3 |
|                               | <i>TP53</i>   | <b>88</b>  | Met237Thr  | 49.16 | missense | NM_000546.5 |

1 PanIN/IPMN in cases without associated/concomitant PDAC are indicated in bold.

2

3

4

5

1 **Supplementary table 4. Distribution of CNV-positive and negative precursor lesions**  
 2 **according to the degree of dysplasia.**

|                        |                   | <i>CNV pos</i> | <i>CNV neg</i> |
|------------------------|-------------------|----------------|----------------|
| <i>PanIN</i>           | <b>Low-grade</b>  | 16 (57%)       | 12 (43%)       |
|                        | <b>High-grade</b> | 6 (75%)        | 2 (25%)        |
| <i>Gastric IPMN</i>    | <b>Low-grade</b>  | 22 (76%)       | 7 (24%)        |
|                        | <b>High-grade</b> | 6 (75%)        | 3 (25%)        |
| <i>Intestinal IPMN</i> | <b>Low-grade</b>  | 8 (100%)       | 0              |
|                        | <b>High-grade</b> | 13 (100%)      | 0              |

3 Percentages refers to the total number of cases in each group

4

5

6

7

8

9

10

11

12

13

14

**Supplementary table 5: Overview of log<sub>2</sub> copy number ratios sorted in ascending order. Values of genomic alterations were detected by low-coverage sequencing (n=28) and DNA methylation data (n=67), respectively.**

| Genomic location          | affected samples (n) | PanIN (n=36) | gIPMN (n=38) |       |       | iIPMN (n=21) |       |       |
|---------------------------|----------------------|--------------|--------------|-------|-------|--------------|-------|-------|
| <b>deleted regions</b>    |                      |              |              |       |       |              |       |       |
| chr01:010875000-013052998 | 3                    |              |              |       |       | -0.26        | -0.25 | -0.24 |
| chr01:015375000-016825000 | 3                    |              |              |       |       | -0.26        | -0.25 | -0.20 |
| chr06:074175000-074375000 | 5                    |              | -0.29        | -0.22 | -0.21 | -0.44        | -0.24 |       |
| chr06:133664400-143100000 | 5                    |              | -0.37        | -0.28 |       | -0.50        | -0.45 | -0.28 |
| chr06:143620678-151100000 | 7                    | -0.21        | -0.37        | -0.34 | -0.29 | -0.50        | -0.45 | -0.28 |
| chr09:005958053-023802212 | 5                    | -0.23        | -0.51        | -0.36 | -0.36 | -0.24        |       |       |
| chr10:071075000-120925000 | 6                    |              | -0.45        | -0.22 |       | -0.36        | -0.30 | -0.28 |
| chr10:120925000-125869472 | 5                    |              | -0.30        |       |       | -0.41        | -0.30 | -0.28 |
| chr11:057325000-058807232 | 4                    |              |              |       |       | -0.44        | -0.40 | -0.27 |
| chr11:058807232-069089801 | 5                    |              |              |       |       | -0.44        | -0.40 | -0.28 |
| chr11:096437584-114325000 | 5                    |              |              |       |       | -0.51        | -0.44 | -0.40 |
| chr11:114325000-134898258 | 4                    |              |              |       |       | -0.51        | -0.44 | -0.28 |
| chr17:006225000-009675000 | 4                    |              | -0.50        | -0.32 | -0.21 | -0.23        |       |       |
| chr17:009675000-012500000 | 5                    |              | -0.53        | -0.31 | -0.21 | -0.50        | -0.22 |       |
| chr17:015792977-021566608 | 6                    |              | -0.58        | -0.23 | -0.21 | -0.49        | -0.32 | -0.25 |
| <b>amplified regions</b>  |                      |              |              |       |       |              |       |       |
| chr01:035225000-037325000 | 3                    |              |              |       |       | 0.25         | 0.33  | 0.61  |



|                           |   |      |      |      |      |      |      |      |      |      |      |  |
|---------------------------|---|------|------|------|------|------|------|------|------|------|------|--|
| chr03:176225000-188875000 | 6 | 0.26 | 0.21 | 0.23 | 0.28 | 0.38 | 0.44 |      |      |      |      |  |
| chr05:028950000-044925000 | 5 |      |      |      | 0.24 | 0.25 | 0.31 | 0.74 | 0.79 |      |      |  |
| chr06:024125000-033575000 | 5 |      | 0.25 | 0.36 | 0.31 | 0.35 | 0.56 |      |      |      |      |  |
| chr06:033575000-042725000 | 4 |      | 0.42 |      | 0.32 | 0.34 | 0.56 |      |      |      |      |  |
| chr07:000282484-007150000 | 5 |      |      |      | 0.22 | 0.30 | 0.32 | 0.36 | 0.41 |      |      |  |
| chr07:054725000-055775000 | 5 |      |      |      | 0.21 | 0.26 | 0.27 | 0.33 | 0.36 |      |      |  |
| chr07:061967157-074715724 | 4 |      |      |      | 0.27 | 0.32 | 0.36 | 0.37 |      |      |      |  |
| chr07:112425436-130154523 | 5 |      |      |      | 0.21 | 0.33 | 0.36 | 0.38 | 0.57 |      |      |  |
| chr07:139404377-142048195 | 5 |      |      |      | 0.22 | 0.32 | 0.36 | 0.33 | 0.58 |      |      |  |
| chr07:143397897-154270634 | 5 |      |      |      | 0.24 | 0.33 | 0.34 | 0.38 | 0.59 |      |      |  |
| chr08:086726451-089550000 | 3 |      |      |      | 0.21 | 0.31 | 0.36 |      |      |      |      |  |
| chr08:127450000-129175000 | 7 | 0.42 |      |      | 0.21 | 0.27 | 0.29 | 0.36 | 0.56 | 0.66 |      |  |
| chr09:001992685-035698318 | 3 |      |      |      | 0.24 | 0.32 | 0.61 |      |      |      |      |  |
| chr09:070835468-092343416 | 4 |      |      |      | 0.22 | 0.26 | 0.32 | 0.60 |      |      |      |  |
| chr09:096718222-097575000 | 4 |      |      |      | 0.21 | 0.24 | 0.32 | 0.60 |      |      |      |  |
| chr09:097775000-114750000 | 4 |      |      |      | 0.22 | 0.26 | 0.32 | 0.61 |      |      |      |  |
| chr09:124994207-133073060 | 3 |      |      |      | 0.22 | 0.32 | 0.61 |      |      |      |      |  |
| chr12:006475000-007169938 | 8 | 0.21 |      |      | 0.24 | 0.33 | 0.56 | 0.71 | 0.88 | 0.89 | 1.70 |  |
| chr12:024993545-028938805 | 4 | 0.21 |      |      | 0.21 | 0.38 | 1.32 |      |      |      |      |  |
| chr14:020700000-022050000 | 3 |      |      |      | 0.21 | 0.28 | 0.33 |      |      |      |      |  |
| chr14:022800000-050175000 | 3 |      |      |      | 0.22 | 0.25 | 0.35 |      |      |      |      |  |
| chr14:097258910-107289540 | 3 |      |      |      | 0.25 | 0.22 | 0.36 |      |      |      |      |  |
| chr17:061125000-062410760 | 3 |      |      |      | 0.32 | 0.32 | 0.74 |      |      |      |      |  |
| chr17:062775000-063525000 | 3 |      |      |      | 0.32 | 0.34 | 0.49 |      |      |      |      |  |
| chr17:068117898-077546461 | 3 |      |      |      | 0.21 | 0.32 | 0.38 |      |      |      |      |  |

|                           |   |      |      |      |      |      |      |      |
|---------------------------|---|------|------|------|------|------|------|------|
| chr20:008050000-016400000 | 7 | 0.24 | 0.22 | 0.23 | 0.24 | 0.26 | 0.33 | 0.84 |
| chr20:016625000-021300000 | 7 | 0.25 | 0.22 | 0.23 | 0.25 | 0.28 | 0.33 | 0.82 |
| chr20:030025000-034897085 | 7 | 0.26 | 0.22 | 0.22 | 0.23 | 0.31 | 0.33 | 0.81 |
| chr20:036958189-042991501 | 6 | 0.26 | 0.22 | 0.23 | 0.35 | 0.33 | 0.79 |      |
| chr20:052650000-061091437 | 7 | 0.23 | 0.22 | 0.22 | 0.23 | 0.33 | 0.35 | 0.80 |
| chr21:032825000-034475000 | 3 |      | 0.21 | 0.26 | 0.30 |      |      |      |

1

1 **Supplementary table 6a: Differentially methylated probes in low- and high-grade pancreatic**  
 2 **cancer precursors.**

|       | Low-grade samples | High-grade samples | DMPs (hypermethylated in high-grade) | DMP associated genes (hypermethylated in high-grade) |
|-------|-------------------|--------------------|--------------------------------------|------------------------------------------------------|
| iPMN  | 8                 | 12                 | 0                                    | 0                                                    |
| gIPMN | 24                | 8                  | 0                                    | 0                                                    |
| PanIN | 20                | 7                  | 86 (62)                              | 59 (45)                                              |

3 iIPMN: intestinal IPMN; gIPMN: gastric IPMN

4

5 **Supplementary table 6b: Genes associated with significantly hyper- or hypomethylated CpG**  
 6 **in PanIN high-grade**

| Genes associated with at least one significantly hypermethylated CpG | Genes associated with at least one significantly hypomethylated |
|----------------------------------------------------------------------|-----------------------------------------------------------------|
| TAC1                                                                 | GLRX                                                            |
| AKAP13                                                               | BCL11B                                                          |
| POLR1D                                                               | ITFG3                                                           |
| GLYATL3                                                              | IFT140                                                          |
| HOXA5                                                                | CTNNA3                                                          |
| ZIC2                                                                 | RUNX1                                                           |
| SIM2                                                                 | SPARCL1                                                         |
| ARID4B                                                               | PHLDB1                                                          |
| MON2                                                                 | NINJ2                                                           |
| CNKSR3                                                               | METTL9                                                          |
| SP8                                                                  | SLC51A                                                          |
| ADD2                                                                 | EMID2                                                           |
| HOXB1                                                                | CACNA1A                                                         |
| ST3GAL6                                                              | C19orf35                                                        |
| FBN2                                                                 |                                                                 |
| ZIK1                                                                 |                                                                 |
| LRP1B                                                                |                                                                 |
| NTRK3                                                                |                                                                 |
| GLI3                                                                 |                                                                 |
| NTM                                                                  |                                                                 |
| RASGRF1                                                              |                                                                 |
| FAM46C                                                               |                                                                 |

|              |  |
|--------------|--|
| NXPH1        |  |
| LBX2         |  |
| LOC101929710 |  |
| ADRA1A       |  |
| GRIK3        |  |
| PARP8        |  |
| KIAA1026     |  |
| SLC6A15      |  |
| IRX1         |  |
| GRIA4        |  |
| TLE4         |  |
| DGKI         |  |
| PACSIN2      |  |
| DOK5         |  |
| ZIC4         |  |
| MYLK         |  |
| DAPK1        |  |
| C5orf66-AS1  |  |
| AMER3        |  |
| CPEB1        |  |
| ST6GAL2      |  |
| INA          |  |
| AP2A2        |  |

1

## 1 **Supplementary Figure Legends**

### 2 **Supplementary figure 1: Overview of lesions and methods**

3 55 PanINs, 46 gastric IPMNs (gIPMN) and 21 intestinal IPMNs (iIPMN) were subjected to 4  
4 main analyses: targeted next generation sequencing (n=52), low-coverage whole-genome  
5 sequencing (n=28), genome-wide DNA methylation analysis (n=79) and transcriptome analysis  
6 (n=34). Each circle of the diagram represents one of the mentioned methods and includes the  
7 number of samples used for related analyses. The samples that could not be placed into the  
8 diagram were shown at the right bottom corner of the figure. Pancreatobiliary and mixed-type  
9 IPMNs were excluded from further analyses due to small sample size.

### 10 **Supplementary figure 2: Allele frequency of *KRAS* and *GNAS* mutations in different precursor 11 lesions.**

12 (A) VAF of *KRAS* mutations; (B) VAF of *GNAS* mutations; (C) scatterplot of the VAF of the *KRAS*  
13 mutations (G12) against the VAF of *GNAS* mutations (R201) detected in low- and high-grade  
14 gastric IPMN. The grey lines represent the 95% confidence interval of the Pearson's correlation  
15 coefficient  $r$  (n=9). (Kruskal-Wallis-test \*  $p < 0.05$ ; \*\*  $p < 0.01$ ; \*\*\*  $p < 0.001$ ).

16

### 17 **Supplementary figure 3: Morphology of lesions with different genetic status according to 18 targeted NGS**

19 Representative HE images of low- and high-grade PanINs, gastric IPMNs and intestinal IPMNs  
20 with variable mutation profiles detected by targeted NGS are shown. No specific morphology  
21 was identified related to the mutation status between the samples in the same diagnostic  
22 group. In particular, gastric lesions with *GNAS* mutations (case 127, 96, 99 and 112) did not  
23 show relevant intestinal differentiation; only in case 112, focal (<5% of the cells) expression of  
24 *MUC2* and *CDX2* was observed (not shown). Scale bars represent 200  $\mu\text{m}$ . Detailed mutation  
25 profile of the samples is provided in Suppl. Table 3.

### 26 **Supplementary figure 4: Quality control of DNA methylation data derived from normal 27 pancreas cell preparations.**

28 (A) Multi-dimensional scaling of the 1000 most variable probes. (B) Hierarchical clustering of  
29 probes for known acinar and ductal marker genes.

1

2 **Supplementary figure 5: Proliferation activity, expression of TFF3 and of MUCL3 protein in**  
3 **PanIN, IPMN and PDAC.**

4 Representative images (A) and related graphs (B-D) of IHC staining performed in whole tissue  
5 sections in 31 PanIN, 28 gastric IPMN, 20 intestinal IPMN and 24 PDAC. Intestinal IPMNs and  
6 PDACs showed higher proliferation rates with Ki67 staining than PanIN and gastric IPMN. TFF3  
7 was strongly expressed in intestinal IPMN. Gastric IPMN revealed higher expression of MUCL3  
8 compared to PanIN. Scale bars represent 100  $\mu$ m. (IRS: immunoreactivity score) (\* $p < 0.05$ ).

9

10 **Supplementary figure 6: Hierarchical clustering of DNA methylation data based on published**  
11 **marker genes for distinct normal pancreas cell populations.** The mean methylation beta-  
12 value for all gene associated probes is displayed, respectively.

13

14 **Supplementary figure 7: Differentially activated gene sets.** Displayed pathways were  
15 detected by pairwise comparison between the indicated lesions. Odds ratios below 0.8  
16 indicate the activation in the first listed lesion whereas 1.1 is associated with the second  
17 group. The analyzed gene sets based on the KEGG pathway (A) and hallmarks (B) from  
18 the MSigDB.

19

20

21

22

23
