# Supplementary material for: Molecular heterogeneity and commonalities in pancreatic cancer precursors with gastric and intestinal phenotype
Source: HighWire-hosted journal article supplement (doi:10.1136/gutjnl-2021-326550), 2022-08-09

Layer

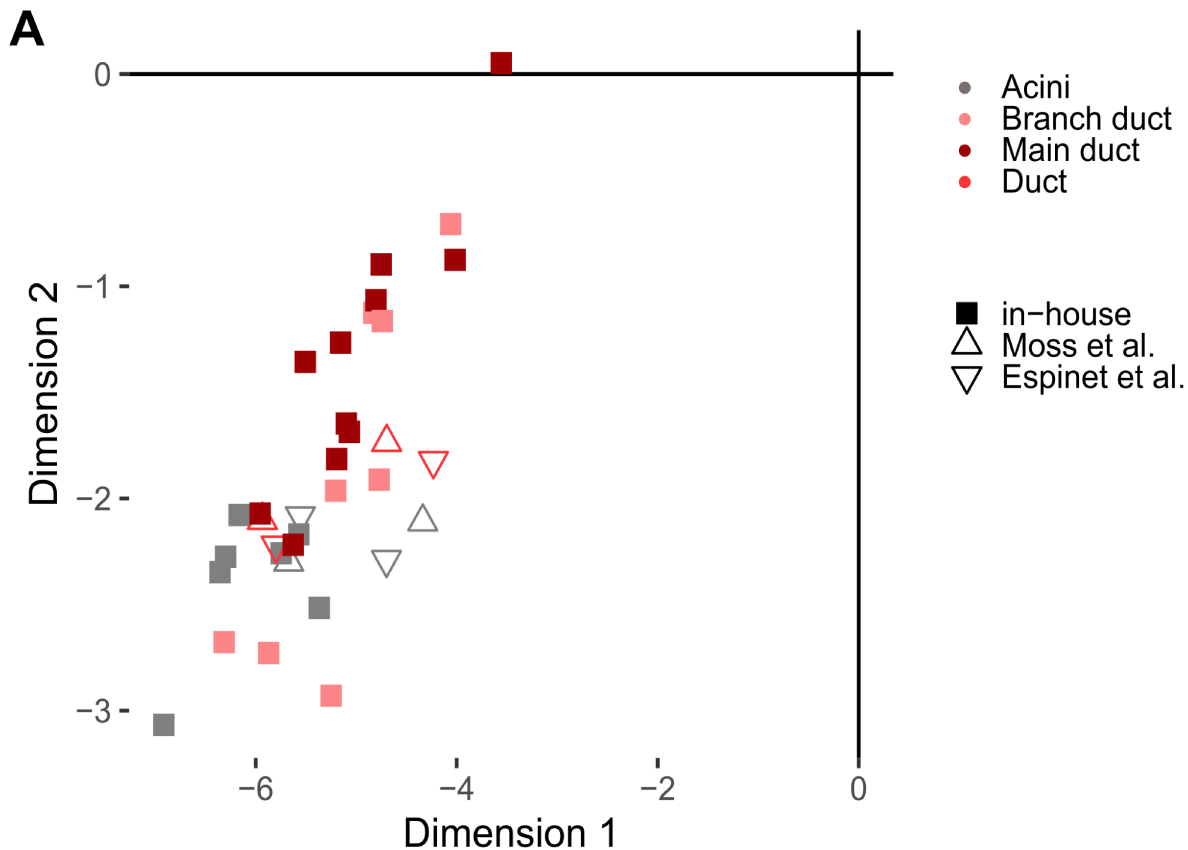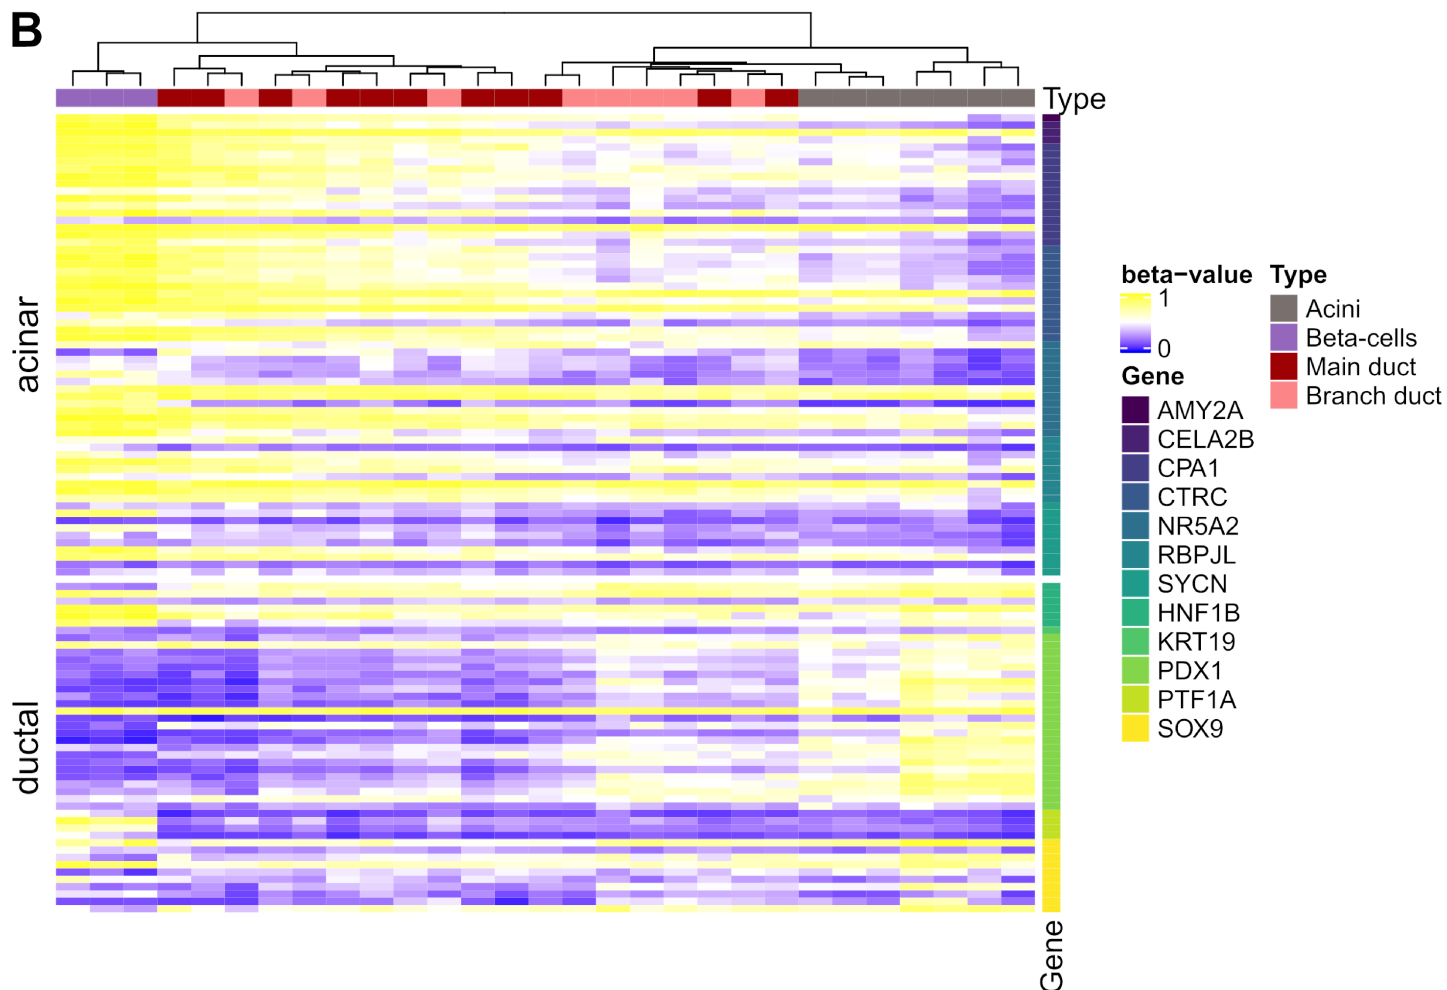

Supplement: gutjnl-2021-326550supp005_data_supplement.pdf [file gutjnl-2021-326550supp005_data_supplement.pdf]
