# Supplementary figures and images for: Molecular heterogeneity and commonalities in pancreatic cancer precursors with gastric and intestinal phenotype
Source: HighWire-hosted journal article supplement (doi:10.1136/gutjnl-2021-326550), 2022-08-09

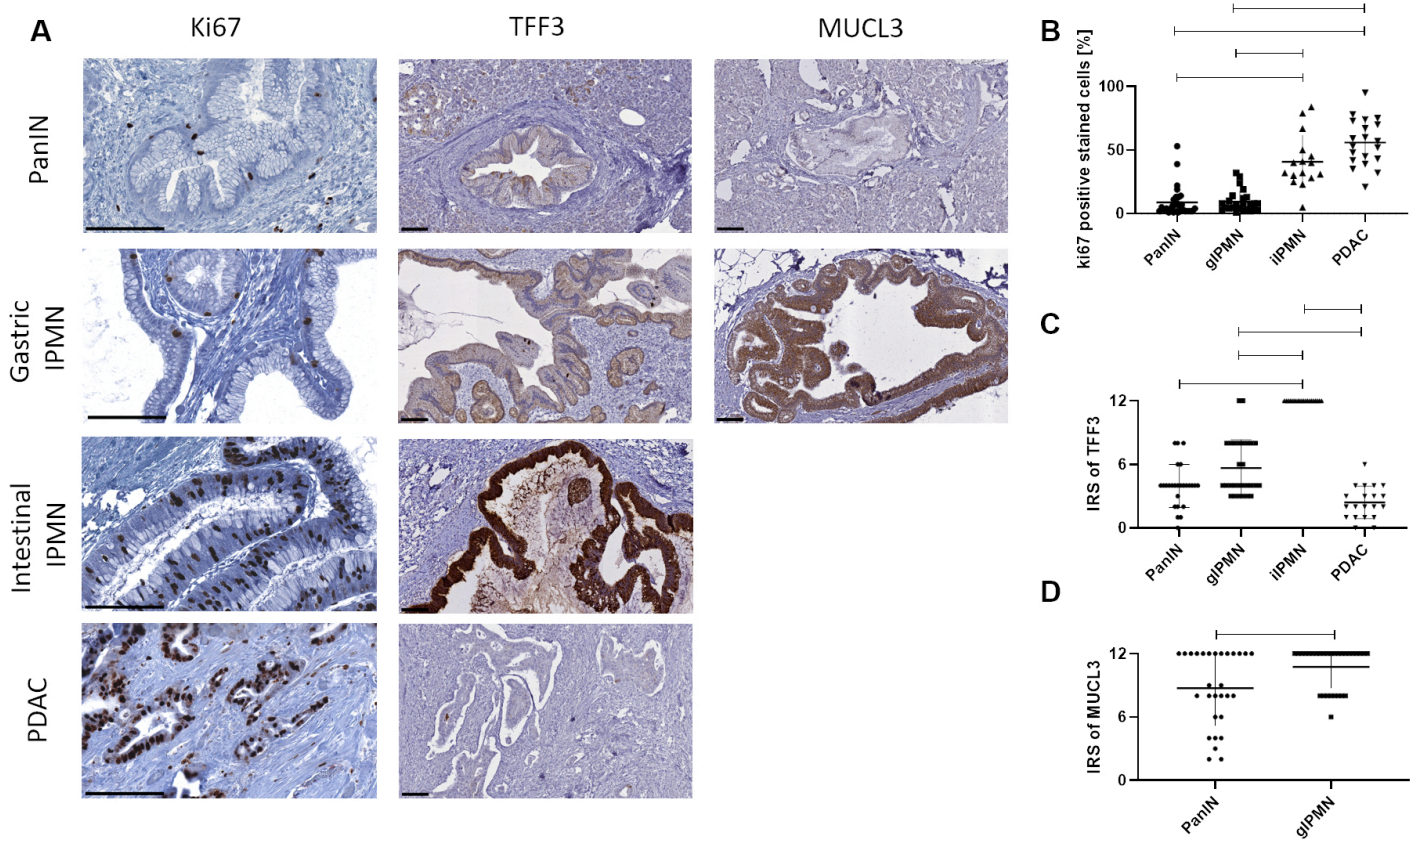

Supplement: gutjnl-2021-326550supp006_data_supplement.pdf [file gutjnl-2021-326550supp006_data_supplement.pdf]

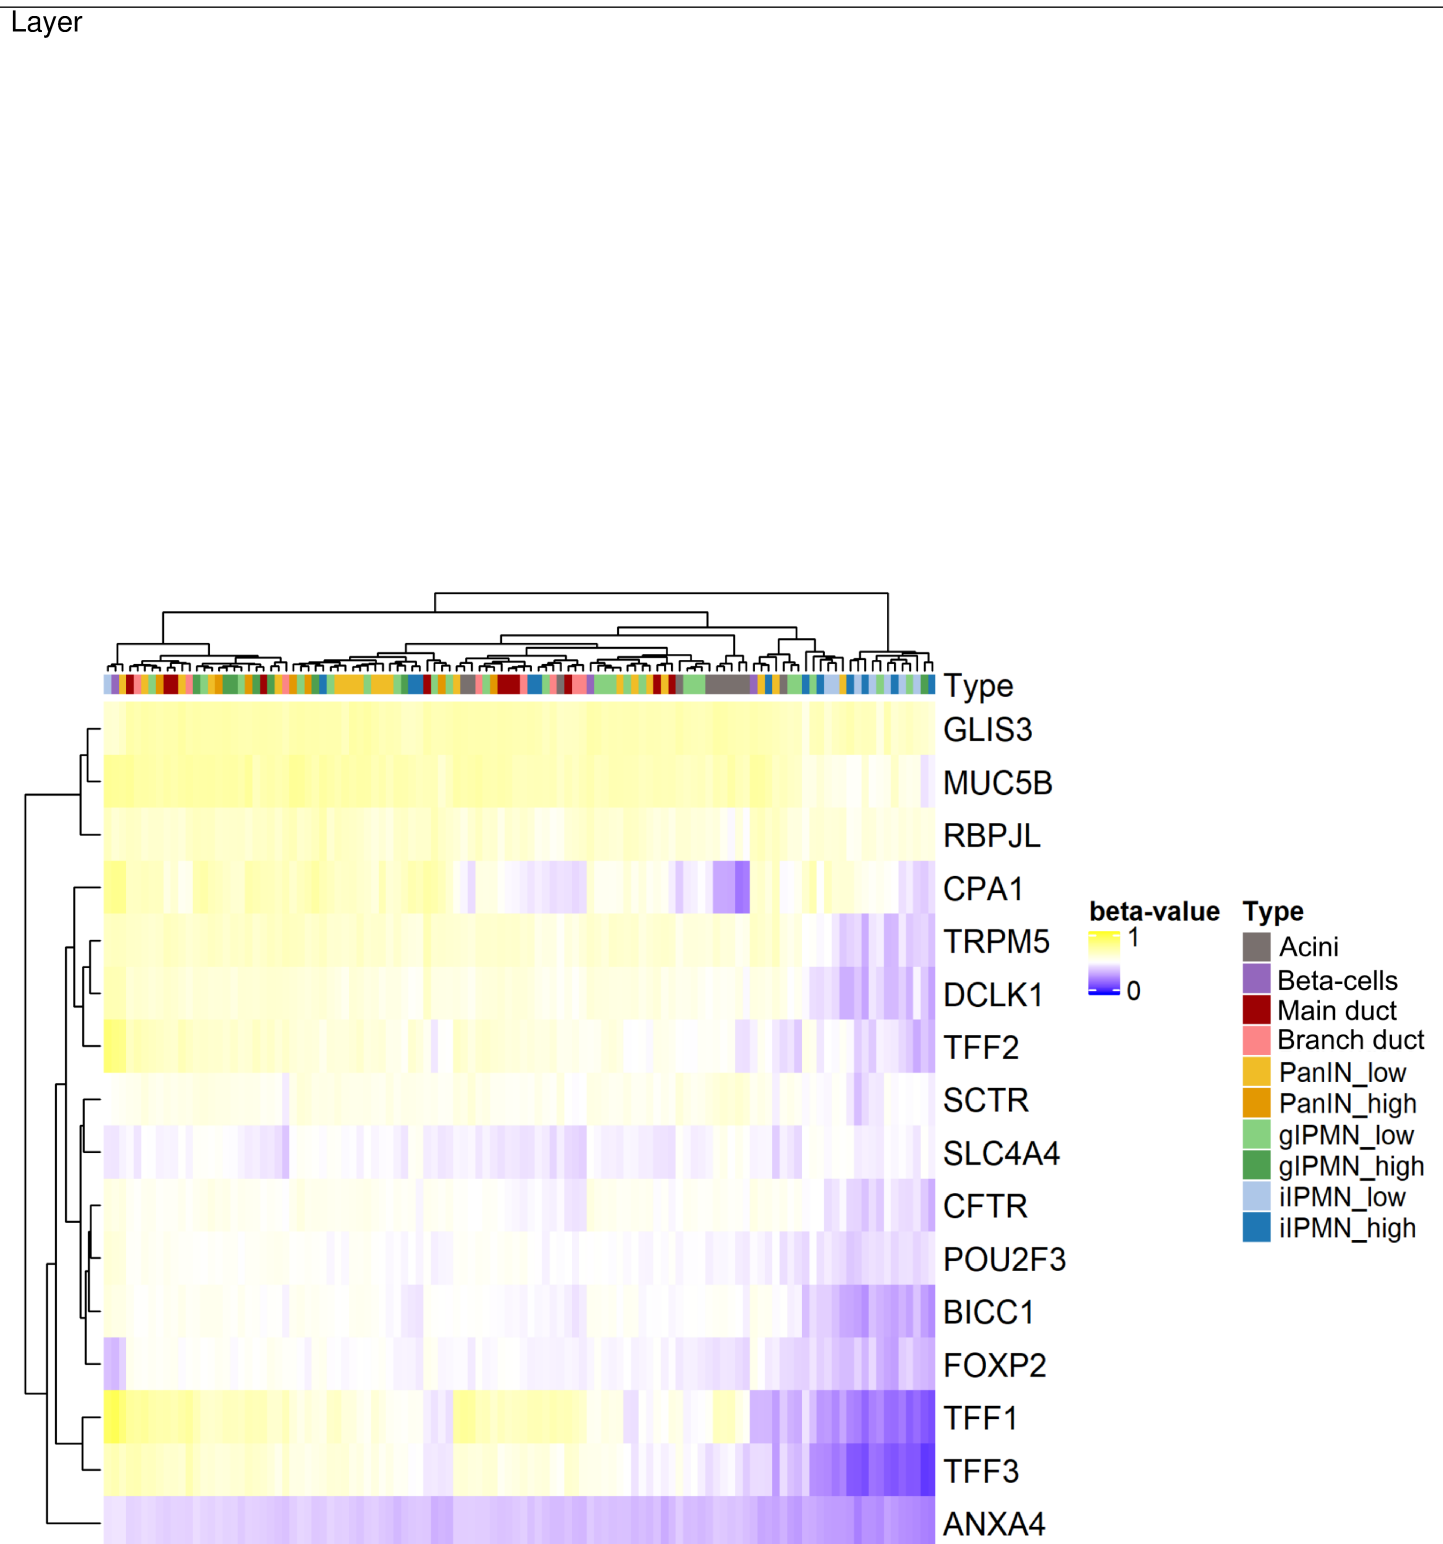

Supplement: gutjnl-2021-326550supp007_data_supplement.pdf [file gutjnl-2021-326550supp007_data_supplement.pdf]

## Suppl. Figure 3.tif

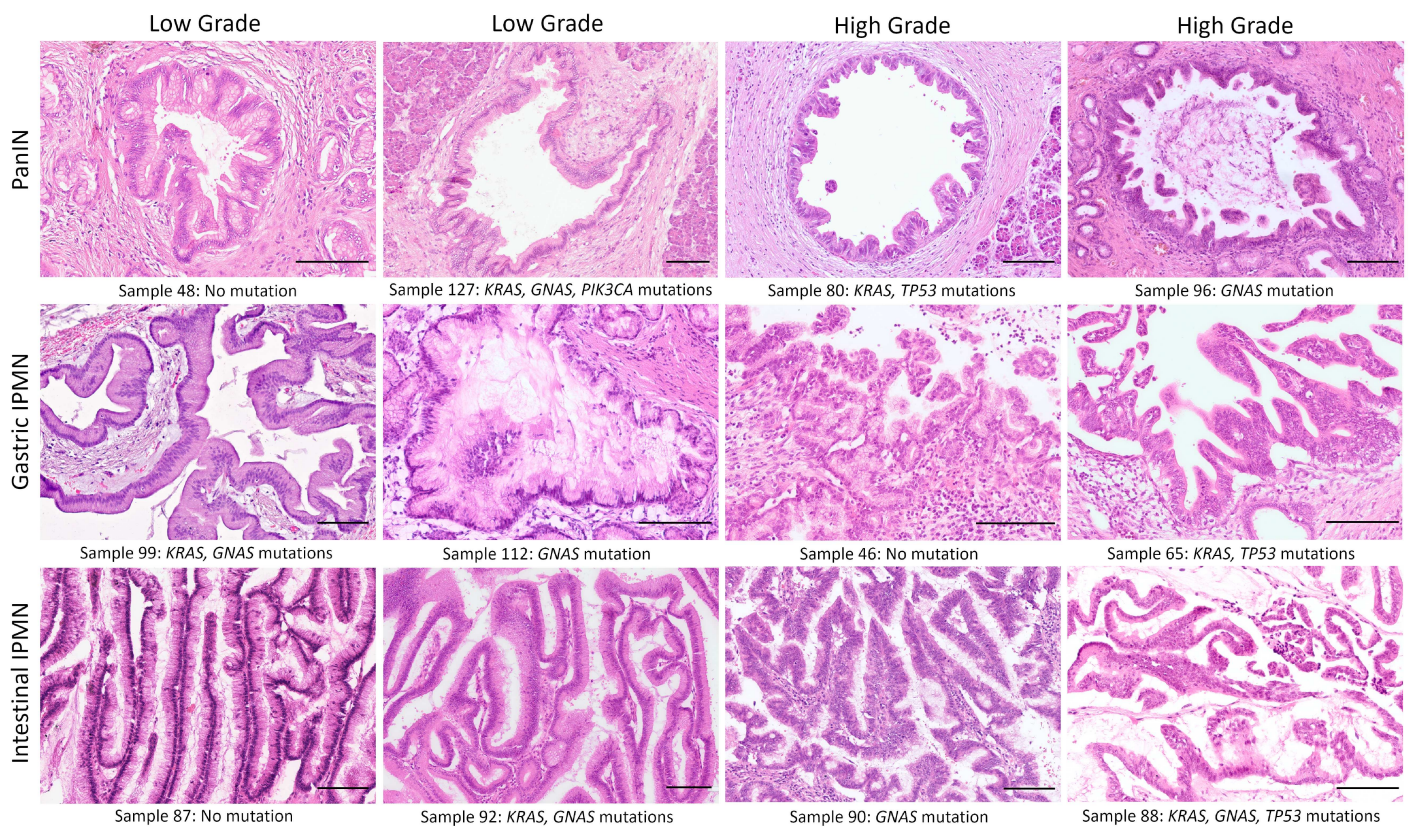

Supplement: gutjnl-2021-326550supp004_data_supplement.pdf [file gutjnl-2021-326550supp004_data_supplement.pdf]

Layer

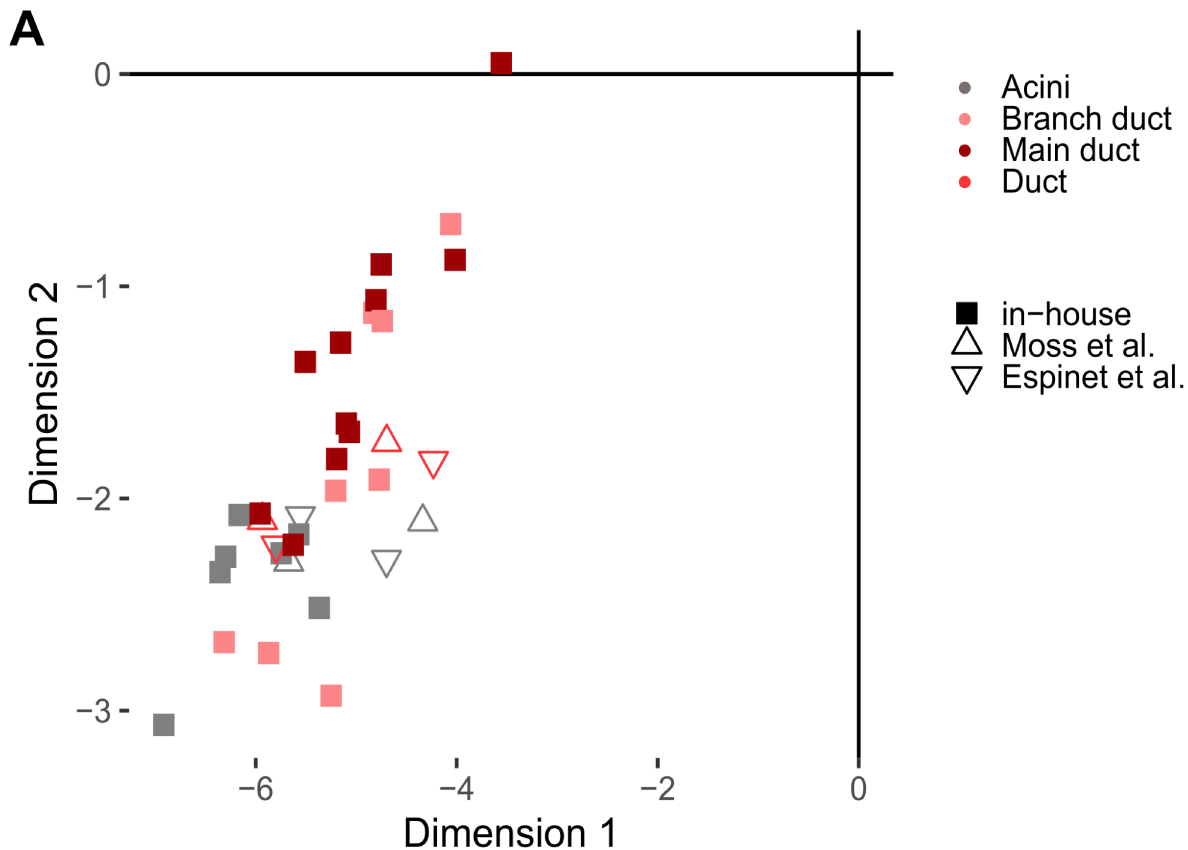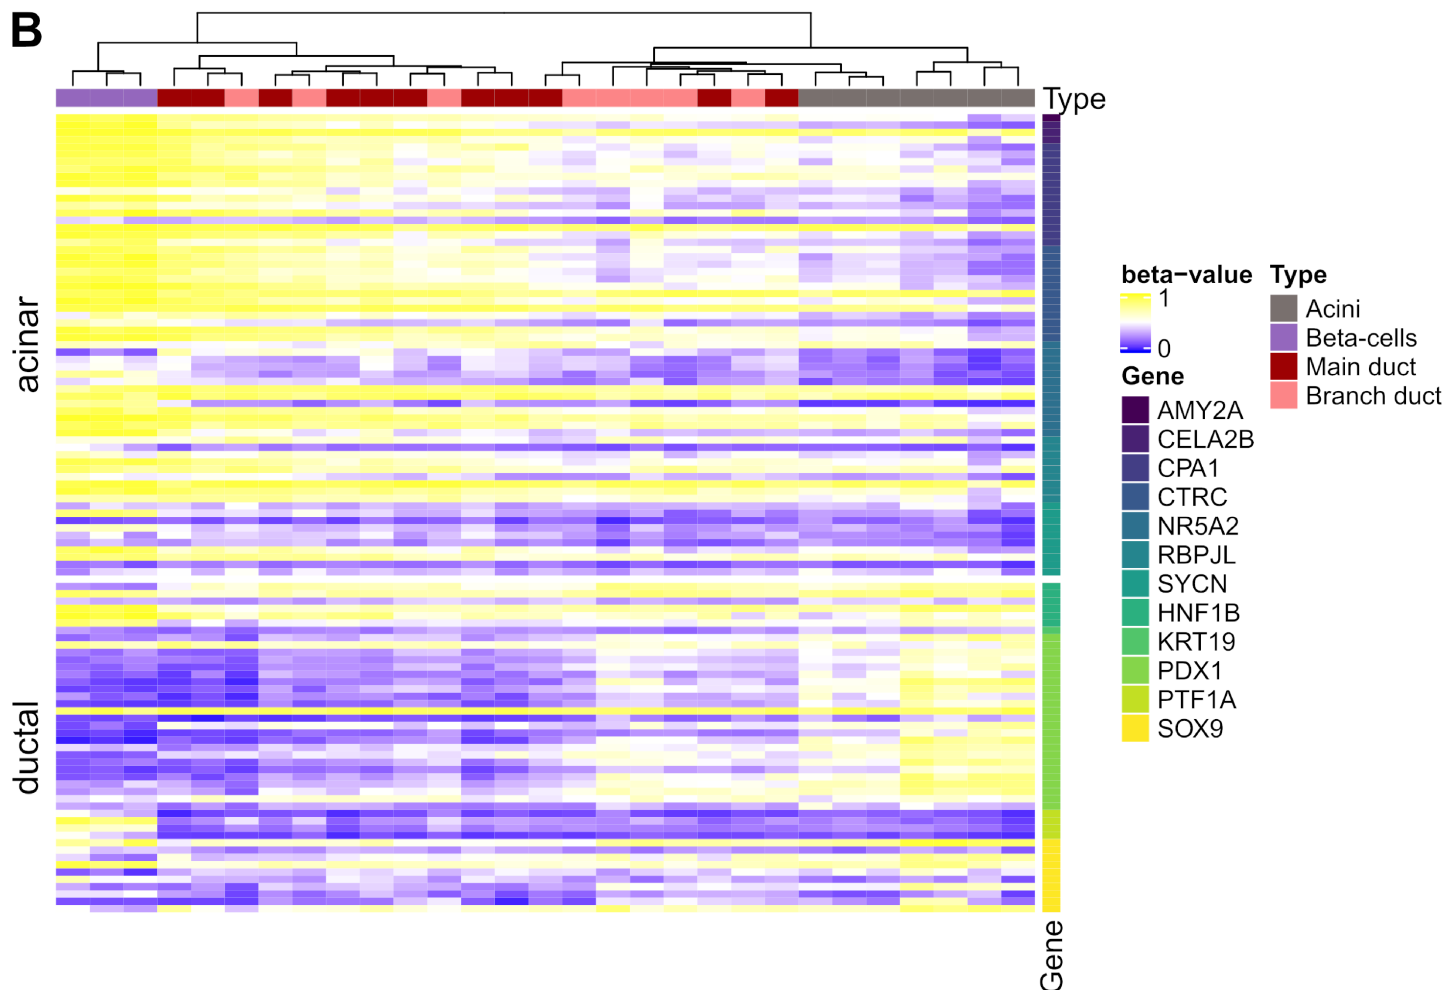

Supplement: gutjnl-2021-326550supp005_data_supplement.pdf [file gutjnl-2021-326550supp005_data_supplement.pdf]

## Suppl. Figure 1.jpg

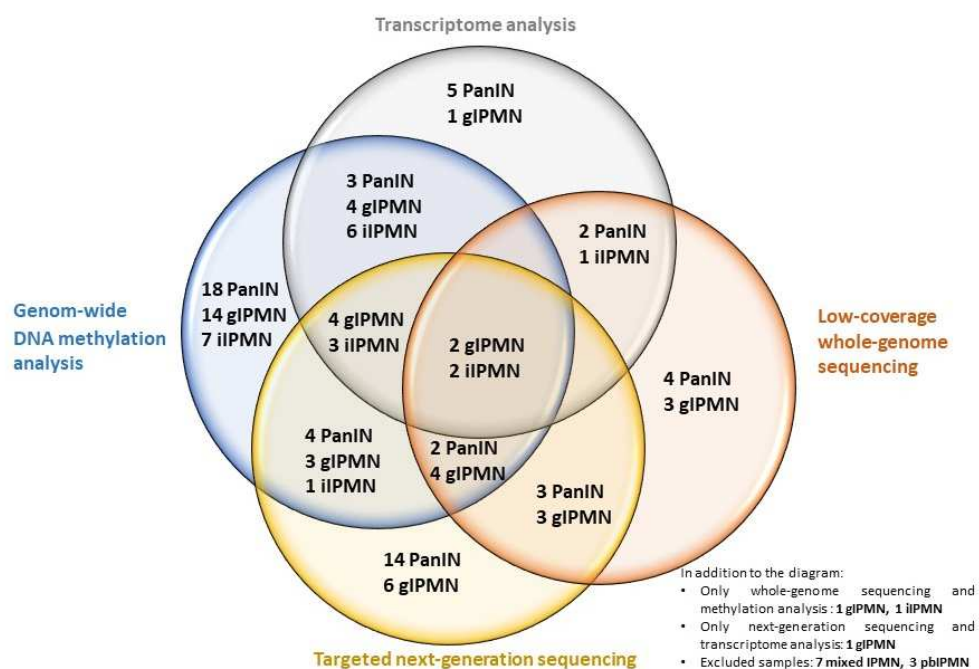

Supplement: gutjnl-2021-326550supp002_data_supplement.pdf [file gutjnl-2021-326550supp002_data_supplement.pdf]

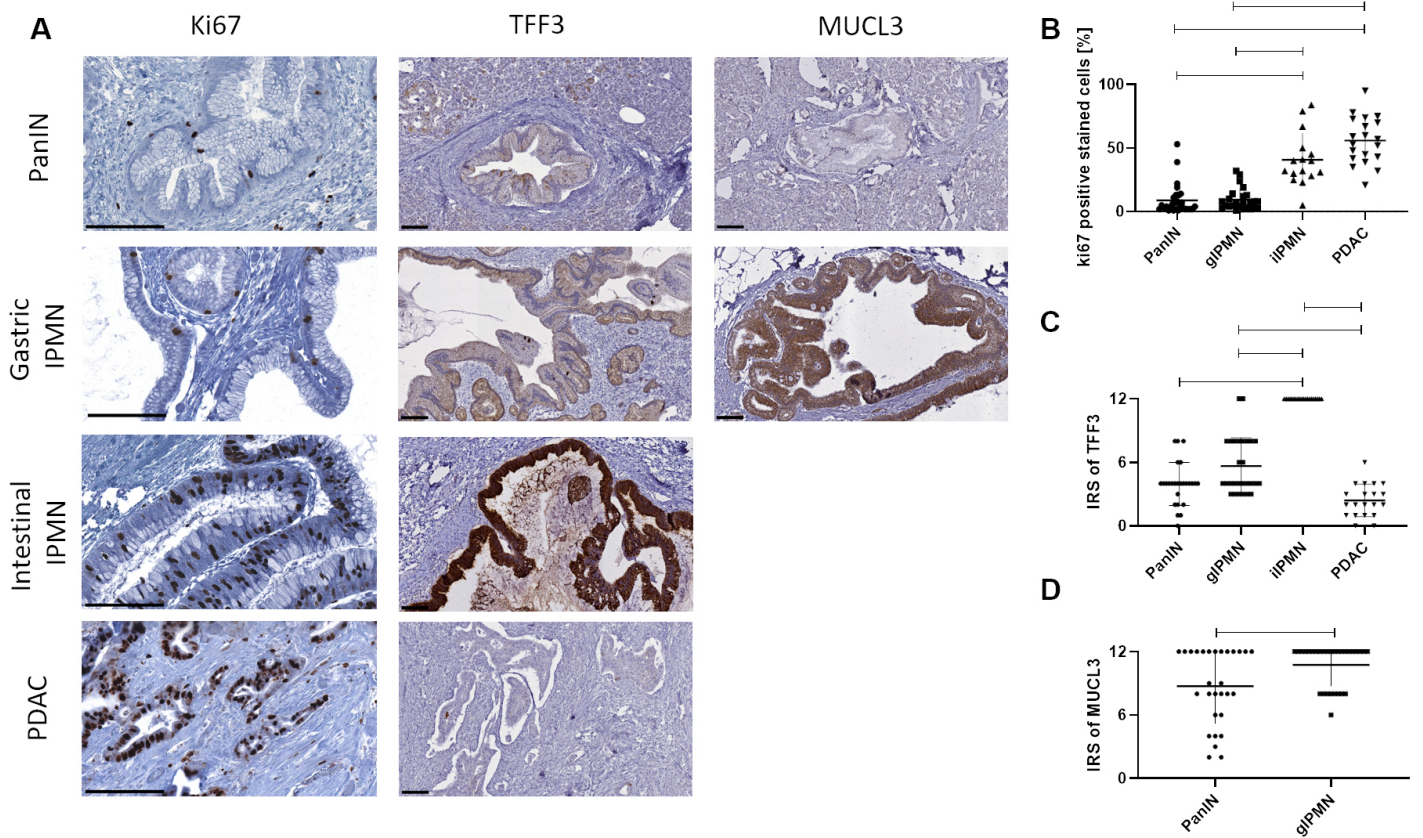

Supplement: gutjnl-2021-326550supp006_data_supplement.pdf [file gutjnl-2021-326550supp006_data_supplement.pdf]

Suppl. Figure 7.tiff

**A**

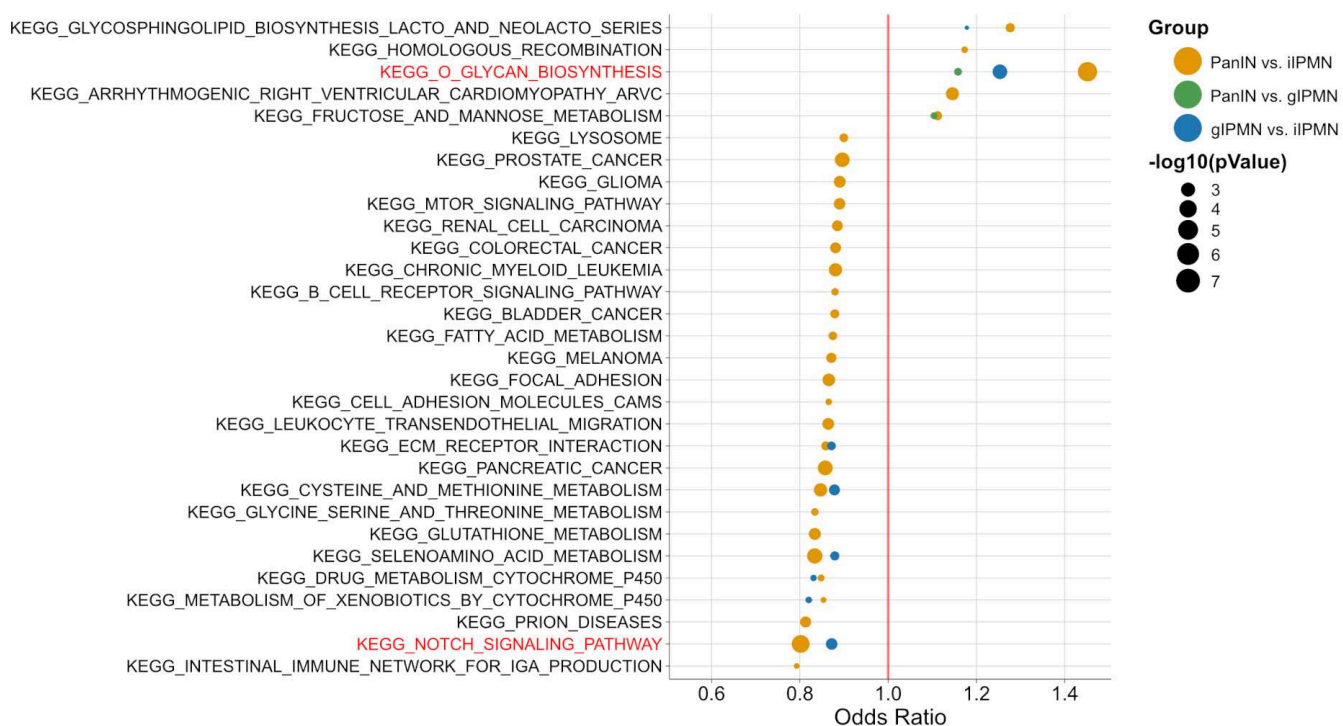

**B**

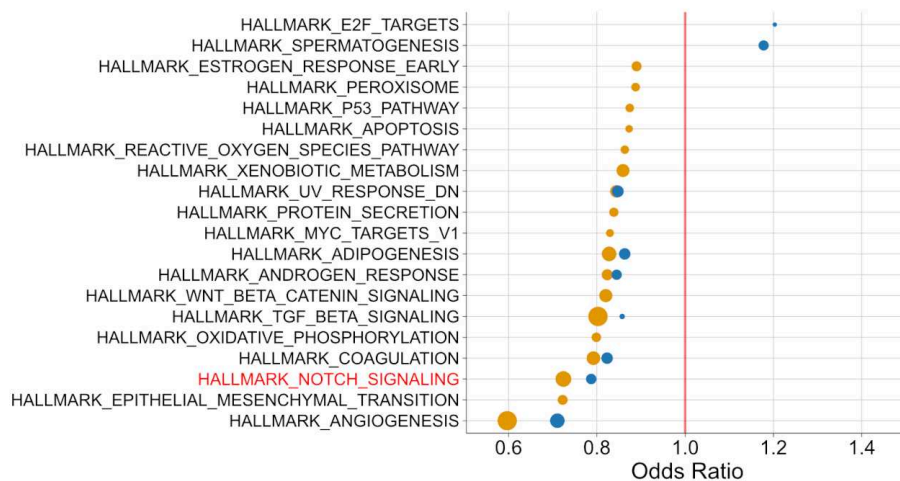

Supplement: gutjnl-2021-326550supp008_data_supplement.pdf [file gutjnl-2021-326550supp008_data_supplement.pdf]
